# Supplementary material for: Association Between Risk-of-Bias Assessments and Results of Randomized Trials in Cochrane Reviews: The ROBES Meta-Epidemiologic Study
Source: PubMed Central journal article supplement (PMC5928453; doi:10.1093/aje/kwx344), 2017-10-19
Supplement: kwx344savovicwebmaterialfinal.pdf [file kwx344savovicwebmaterialfinal.pdf]

# “Association Between Risk-of-Bias Assessments and Results of Randomized Trials in Cochrane Reviews: the ROBES Meta-Epidemiologic Study”

## Web Material

### Table of Contents

|                                                                                                                                                                           |    |
|---------------------------------------------------------------------------------------------------------------------------------------------------------------------------|----|
| List of Web Figures and Tables .....                                                                                                                                      | 2  |
| Abbreviations.....                                                                                                                                                        | 2  |
| Web Appendix 1: Supplementary Methods.....                                                                                                                                | 3  |
| Selection of eligible meta-analyses.....                                                                                                                                  | 3  |
| Web Appendix 2: Analysis Details, Model Specification and WinBUGS Code .....                                                                                              | 5  |
| Illustration of the analysis on a single meta-analysis example.....                                                                                                       | 5  |
| Statistical analysis details .....                                                                                                                                        | 6  |
| WinBUGS code for univariable analyses (Model A) for estimation of average bias and between and within meta-analysis heterogeneity.....                                    | 10 |
| WinBUGS code for multivariable analyses (Model B) for estimation of average bias and between and within meta-analysis heterogeneity.....                                  | 12 |
| WinBUGS code for multivariable analyses with interaction terms (Model C), allowing for interactions between sequence generation, allocation concealment and blinding..... | 15 |
| Web Appendix 3: Included Reviews and Meta-Analyses.....                                                                                                                   | 20 |
| Web Figure 2.....                                                                                                                                                         | 35 |
| Web Figure 3.....                                                                                                                                                         | 36 |
| Web Figure 4.....                                                                                                                                                         | 37 |
| Web Table 1.....                                                                                                                                                          | 38 |
| Web Table 2.....                                                                                                                                                          | 39 |
| Web Table 3.....                                                                                                                                                          | 40 |

## List of Web Figures and Tables

|                                                                                                                                                                                                                                                                                                                                                                     |    |
|---------------------------------------------------------------------------------------------------------------------------------------------------------------------------------------------------------------------------------------------------------------------------------------------------------------------------------------------------------------------|----|
| <b>Web Figure 1.</b> Example Meta-analysis, Depicting the Ratio of Odds Ratios Comparing the Overall Intervention Effect in Studies at High or Unclear Risk of Bias With That in Studies at Low Risk of Bias for Sequence Generation.....                                                                                                                           | 6  |
| <b>Web Figure 2.</b> Number of Trials With Each Combination of the Four Risk of Bias Domain Judgements by Type of Outcome Measure .....                                                                                                                                                                                                                             | 35 |
| <b>Web Figure 3.</b> Estimated Ratios of Odds Ratios and Effects on Heterogeneity Associated With Risk of Bias Judgements for Each Domain Independently, According to Type of Outcome Measure: Univariable Analyses (Model A).....                                                                                                                                  | 36 |
| <b>Web Figure 4.</b> Estimated Ratios of Odds Ratios and Effects on Heterogeneity From Multivariable Analyses of Associations With Risk of Bias Judgements for Each Domain, Adjusted for the Effect of the Other Three Domains (Model B) .....                                                                                                                      | 37 |
| <b>Web Table 1.</b> Estimated Ratios of Odds Ratios and Between-Meta-Analysis Heterogeneity in Mean Bias Associated With Risk of Bias Judgements, According to Type of Outcome Measure: Univariable Sensitivity Analyses for High Risk of Bias Compared to Low or Unclear Risk of Bias .                                                                            | 38 |
| <b>Web Table 2.</b> Estimated Ratios of Odds Ratios and Between-Meta-Analysis Heterogeneity in Mean Bias Associated With Risk of Bias Judgements, According to Type of Outcome Measure: Univariable Sensitivity Analyses for Meta-Analyses With Other Objective and Semi-Objective Outcomes and for High Risk of Bias Compared to Low Or Unclear Risk of Bias ..... | 39 |
| <b>Web Table 3.</b> Estimated Ratios of Odds Ratios and Between-Meta-Analysis Heterogeneity in Mean Bias Associated With Risk of Bias Judgments, According to Type of Outcome Measure: Multivariable Analyses With Interactions.....                                                                                                                                | 40 |

### Abbreviations

(The) BRANDO study – study name (BRANDO - Bias in Randomized and Observational studies)

(The) ROBES study – study name (ROBES - Risk of Bias in Evidence Synthesis)

## Web Appendix 1: Supplementary Methods

### Selection of eligible meta-analyses

We carried out study selection using a combination of semi-automated queries and manual data categorization by the study team.

*Mapping of the risk of bias items:* Within the Review Manager software, authors of Cochrane reviews can amend the wording of standard risk of bias items or can add and exclude specific items. All verbatim 'non-standard' risk of bias domains were classified into categories to avoid loss of usable risk of bias data due to differences in wording. For example, if the user-defined bias domain was labelled 'randomization method' this was classified as 'sequence generation' domain. The vast majority of risk of bias tables did however contain the standard wording for domains.

*Exclusion of ineligible data:* From the initial dataset of 1399 reviews we excluded reviews that did not have all five recommended risk of bias items completed: sequence generation, allocation concealment, blinding (assessed just as 'blinding' without further descriptors or as blinding of specific, reviewer-defined, groups such as patients or assessors), incomplete outcome data and selective reporting. Having a completed 'Other bias' domain was not required as the use of this domain is recommended for potential topic- or design-specific biases that are not necessarily relevant to all types of studies. We further excluded meta-analyses that had fewer than 5 included trials and meta-analyses without a summary estimate, labelled 'non-estimable' in the supplied dataset (e.g. due to zero events in both intervention groups across all studies, or where review authors chose not to calculate a summary estimate (e.g. where meta-analysis was not considered appropriate)). We further excluded meta-analyses with continuous outcomes. The remaining meta-analyses were then scrutinized individually as follows.

*Selection of meta-analysis with primary outcomes:* In each of the remaining reviews, we tagged meta-analyses with outcome(s) that were described as primary outcomes in the text of the review. The first meta-analysis from each review to be included in our study (referred to as the 'selected' meta-analysis) was selected as follows: 1) If, having followed the exclusion process described above, only one meta-analysis in the review had a primary outcome then this was selected; 2) if there were multiple primary outcome meta-analyses available, the meta-analysis with the most included trials (and, if tied, that with most included participants) was selected from among these; and 3) if there were no primary outcome meta-analyses in the review, the meta-analysis with the most included trials (and, if tied, that with most included participants) was selected.

*Exclusion of overlapping meta-analyses:* For each review, we then examined whether there were any overlapping trials between the 'selected' meta-analysis and all other meta-analyses in that

review, in the order of decreasing size (number of trials, then number of participants), starting with meta-analyses with primary outcomes. The additional meta-analysis was included in the study only if it did not contain any trials already included in the selected meta-analysis. Any subsequent meta-analysis from the same review could only be included if it had no overlapping trials with any of the already included meta-analyses and so on.

*Dealing with meta-analyses' subgroups:* Meta-analyses that had no subgroups were taken whole and all related trial outcome level data were included. Of the meta-analyses that had subgroups, some had an overall estimate across all subgroups, while others only provided estimates for individual subgroups. In the case of the former, we treated such meta-analyses in the same way as those that did not have subgroups, ignoring the subgroups. In a small number of meta-analyses, results from one trial were recorded across 2 subgroups. We checked these to ensure that the same participants did not contribute to both estimates. If overlap was identified (e.g. 3-arm trial where the comparison group was used in both subgroup analyses), we removed one of the occurrences of a trial, at random. When only subgroup level estimates were provided, we assumed there was a justifiable rationale for not calculating an overall estimate (e.g. important clinical heterogeneity). In such cases we included only the largest subgroup, by number of included trials, if tied by number of participants, and if still tied, the subgroup that appeared first in the review.

Meta-analyses categorized as having an active comparison where it was not clear which intervention was experimental or novel were excluded. For the remaining meta-analyses comparing two active interventions, the newer or the more recently introduced intervention was coded as experimental intervention and the older or standard intervention was coded as a comparator in the analysis.

## **Web Appendix 2: Analysis Details, Model Specification and WinBUGS Code**

### **Illustration of the analysis on a single meta-analysis example**

The underlying idea of the analysis is illustrated in Web Figure 1, for a single meta-analysis of antihypertensive medication for prevention of cardiovascular mortality and morbidity in the elderly.<sup>(3)</sup> In this example, the overall odds ratio in studies assessed as at high or unclear risk of bias for sequence generation was 0.69 (95% confidence interval 0.61, 0.78), while the corresponding odds ratio for studies at low risk of bias was 0.87 (95% confidence interval 0.65, 1.16). The ratio of odds ratios comparing studies at high/unclear with low risk of bias measures the difference in effect size in the two sets of trials, and was 0.79 ( $=0.69/0.87$ ) with 95% confidence interval 0.60 to 1.02 (estimated using meta-regression in Stata 14). This process is then repeated for each included meta-analysis and average ratio of odds ratio is estimated across all meta-analyses and measures of how bias varies across meta-analyses.

**Web Figure 1.** Example Meta-analysis, Depicting the Ratio of Odds Ratios Comparing the Overall Intervention Effect in Studies at High or Unclear Risk of Bias With That in Studies at Low Risk of Bias for Sequence Generation

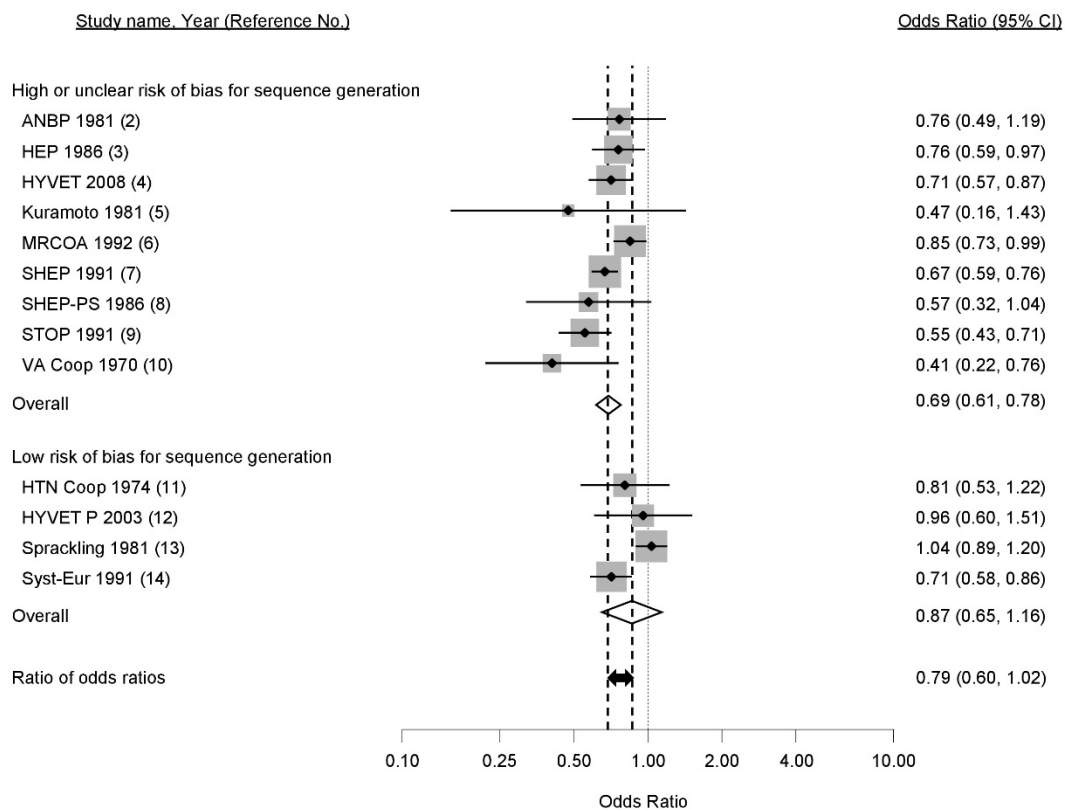

Random-effects meta-analysis of antihypertensive medication (vs placebo or no treatment) for cardiovascular mortality and morbidity, stratified by risk of bias for sequence generation. Odds ratios smaller than 1 favor antihypertensive medication and larger than 1 favor placebo or no treatment. The solid line represents “no difference” between treatments, and the dashed lines represent the estimates from the subgroup meta-analyses of studies with high or unclear risk of bias (top panel) and studies with low risk of bias (lower panel) for sequence generation. The double arrow shows the difference between the subgroup estimates, which is quantified using meta-regression to calculate a ratio of odds ratios and its confidence interval. CI, confidence interval.

### Statistical analysis details

Datasets for main analyses were prepared, and the analyses of correlations between risk of bias domains were carried out using Stata 14 statistical software. Bayesian hierarchical models were fitted in WinBUGS, using two chains run for 500,000 iterations after a burn-in of 50,000 iterations, with the exception of multivariable analyses with interactions, for which two chains were run for 100,000 iterations following a burn-in of 100,000 iterations.

In all models, we assumed that the observed number of events  $r_{im0}, r_{im1}$  in each treatment arm of trial  $i$  in meta-analysis  $m$  has a binomial distribution:

$$r_{im0} \sim \text{Binomial}(\pi_{im0}, n_{im0})$$

$$r_{im1} \sim \text{Binomial}(\pi_{im1}, n_{im1})$$

$$\text{logit}(\pi_{im0}) = \mu_{im}$$

$$\text{logit}(\pi_{im1}) = \mu_{im} + \theta_{im}$$

In the univariable analyses, the underlying log-odds ratio  $\theta_{im}$  in trial  $i$  in meta-analysis  $m$  was assumed equal to

$$\theta_{im} = \delta_{im} + \beta_{im}C_{im} \quad [\text{Model A, univariable analyses}]$$

where  $C_{im} = 1$  for trials with high or unclear risk of bias and  $C_{im} = 0$  for trials with low risk of bias for each bias domain. The parameter  $\delta_{im}$  represents the intervention effect in trials with low risk of bias. These are assumed to be randomly distributed within each meta-analysis  $m$ :

$$\delta_{im} \sim \text{Normal}(d_m, \tau_m^2) \quad (i)$$

Parameter  $\beta_{im}$  quantifies the potential bias associated with the study design characteristic of interest in trial  $i$  within meta-analysis  $m$ . We assumed the following model structure, which allows the bias to vary within each meta-analysis and also allows average bias  $b_m$  to vary across meta-analyses:

$$\beta_{im} \sim \text{Normal}(b_m, \kappa^2) \quad (ii)$$

$$b_m \sim \text{Normal}(b_0, \varphi^2)$$

For all location parameters (overall mean bias  $b_0$ , trial baseline response rates  $\mu_{im}$ , average intervention effects  $d_m$ ), vague Normal(0,1000) or Normal(0,100) priors were assumed. A generic informative prior was declared for the between-trial heterogeneity variances (based on external empirical data) (15):  $\log(\tau_m^2) \sim \text{Normal}(-2.56, 1.74^2)$ . Modified inverse gamma(0.001,0.001) priors were declared for  $\kappa$  and  $\varphi$ , as used in the BRANDO study (16).

For multivariable analyses without interactions, we specified Model B for the underlying log odds ratio  $\theta_{im}$ :

$$\theta_{im} = \delta_{im} + \beta_{1im}C_{1im} + \beta_{2im}C_{2im} + \beta_{3im}C_{3im} + \beta_{4im}C_{4im} \quad [\text{Model B, multivariable analysis}]$$

where  $C_{1im}$  to  $C_{4im}$  refer to bias domains: sequence generation, allocation concealment, blinding and incomplete outcome data; and  $\beta_{1im}$  to  $\beta_{4im}$  quantify the corresponding potential biases associated with high or unclear risk of bias judgements for these domains. The  $\delta_{im}$  were assumed randomly distributed within each meta-analysis, as in (i), and a separate model of the form (ii) was assumed for each bias parameter  $\beta_{1im}$  to  $\beta_{4im}$ .

For multivariable analyses with interaction terms, allowing for interactions between sequence generation, allocation concealment and blinding, we specified Model C for the underlying log odds ratio  $\theta_{im}$ :

$$\theta_{im} = \delta_{im} + \beta_{1im}C_{1im} + \beta_{2im}C_{2im} + \beta_{3im}C_{3im} + \beta_{4im}C_{4im} + \gamma_{1im}C_{2im}C_{3im} + \gamma_{2im}C_{1im}C_{2im} + \gamma_{3im}C_{1im}C_{3im}$$

[Model C, multivariable analysis with interactions]

where parameters  $\gamma_{1im}$  to  $\gamma_{3im}$  quantify the interactions between: allocation concealment and blinding, sequence generation and allocation concealment, and sequence generation and blinding, respectively, when both domains within their respective interaction pairs are at high or unclear risk of bias. The  $\delta_{im}$  were assumed randomly distributed within each meta-analysis, as in (i), and a separate model of the form (ii) was assumed for each bias parameter  $\beta_{1im}$  to  $\beta_{4im}$  and for each interaction parameter  $\gamma_{1im}$  to  $\gamma_{3im}$ .

Priors for all location parameters and for between-trial heterogeneity variances  $\tau_m^2$  were identical to those used in the univariable models. In the multivariable models, we used narrower modified inverse gamma(0.01,0.01) priors for the  $\kappa$  and  $\varphi$  parameters. This change was made because of convergence difficulties with the inverse gamma(0.001,0.001) priors.

## References

1. Musini VM, Tejani AM, Bassett K, et al. Pharmacotherapy for hypertension in the elderly. *Cochrane Database Syst Rev* 2009(4):CD000028.
2. Trial Management Committee. Treatment of mild hypertension in the elderly. A study initiated and administered by the National Heart Foundation of Australia. *Med J Aust* 1981;2(8):398-402.
3. Coope J, Warrender TS. Randomized trial of treatment of hypertension in elderly patients in primary care. *BMJ* 1986;293(6555):1145-1151.
4. Beckett NS, Peters R, Fletcher AE, et al. Treatment of hypertension in patients 80 years of age or older. *N Engl J Med* 2008;358(18):1887-1898.
5. Kuramoto K, Matsushita S, Kuwajima I, et al. Prospective study on the treatment of mild hypertension in the aged. *Jpn Heart J* 1981;22(1):75-85.
6. Meade TW, Peart S, Brennan PJ, et al. Medical-Research-Council trial of treatment of hypertension in older adults - principal results. *BMJ* 1992;304(6824):405-412.



7. Probstfield JL. Prevention of stroke by antihypertensive drug-treatment in older persons with isolated systolic hypertension - final results of the Systolic Hypertension in the Elderly Program (SHEP). *JAMA* 1991;265(24):3255-3264.
8. Perry HM, McDonald RH, Hulley SB, et al. Systolic Hypertension in the Elderly Program, Pilot-Study (SHEP-PS) - morbidity and mortality experience. *J Hypertens* 1986;4:S21-S23.
9. Dahlof B, Lindholm LH, Hansson L, et al. Morbidity and mortality in the Swedish trial in old patients with hypertension (STOP-Hypertension). *Lancet* 1991;338(8778):1281-1285.
10. Veterans Administration Cooperative Study Group on Antihypertensive Agents. Effects of treatment on morbidity in hypertension. II. Results in patients with diastolic blood pressure averaging 90 through 114 mm Hg. *JAMA* 1970;213(7):1143-1152.
11. Hypertension-Stroke Cooperative Study Group. Effect of antihypertensive treatment on stroke recurrence. *JAMA* 1974;229(4):409-418.
12. Bulpitt CJ, Beckett NS, Cooke J, et al. Results of the pilot study for the Hypertension in the Very Elderly Trial. *J Hypertens* 2003;21(12):2409-2417.
13. Sprackling ME, Mitchell JRA, Short AH, et al. Blood-pressure reduction in the elderly - a randomized controlled trial of methyldopa. *BMJ* 1981;283(6300):1151-1153.
14. Amery A, Birkenhager W, Bulpitt CJ, et al. Syst-Eur. A multicentre trial on the treatment of isolated systolic hypertension in the elderly: objectives, protocol, and organization. *Aging (Milano)* 1991;3(3):287-302.
15. Turner RM, Davey J, Clarke MJ, et al. Predicting the extent of heterogeneity in meta-analysis, using empirical data from the Cochrane Database of Systematic Reviews. *Int J Epidemiol* 2012;41(3):818-827.
16. Savović J, Jones H, Altman D, et al. Influence of reported study design characteristics on intervention effect estimates from randomised controlled trials: combined analysis of meta-epidemiological studies. *Health Technol Assess* 2012;16(35):1-82.

## WinBUGS code for univariable analyses (Model A) for estimation of average bias and between and within meta-analysis heterogeneity

```

model{
  for (i in 1:N) {
    r[i] ~ dbin(p[i],n[i])          # likelihood
    logit(p[i]) <- mu[s[i]] + treat[i]*(delta[i] + beta[i] *C1[i])    # model
    beta[i]~dnorm(b[ma[i]],p.k2[ma[i]]|(-10,10)          # between study, within meta-analysis, variation in bias
    delta[i]~dnorm(d[ma[i]],p.d[ma[i]]|(-10,10)          #RE for treatment effect within meta-analysis
    rhat[i] <- p[i] * n[i]          #calculate residual deviance
    dev[i] <- 2 * (r[i] * (log(r[i])-log(rhat[i]))) + (n[i]-r[i]) * (log(n[i]-r[i]) - log(n[i]-rhat[i])))
    redundant[i] <- C0[i]
  }
  resdev <- sum(dev[])

  for (j in 1:N_trial) {mu[j] ~ dnorm(0,.01)}          # priors for study baseline effects - unrelated

  for (m in 1:N_ma) {
    d[m] ~ dnorm(0,.01)          # priors for true fixed (unrelated) treatment effects
    b[m] ~ dnorm(b0,p.phi)          #between meta-analysis variation in mean bias
    var_d[m]~dlnorm(-2.56,0.33)          # generic informative prior for between-trial variances
    p.d[m] <- 1/var_d[m]
    p.k2[m] <- p.k*equals(kappa_ok[m],1) + cut(p.k)*equals(kappa_ok[m],0)
  }

  b0 ~ dnorm(0,.001)          # vague prior for overall mean bias

  p.k1 ~ dgamma(.001,.001)          # vague prior for between study variation in bias
  kappa <- pow(p.k,-0.5)
  p.k <- p.k1/(1-patom.k)
  patom.k ~ dbeta(1,1)

  p.phi1 ~ dgamma(.001,.001)          #vague prior for between meta-analysis variation in mean bias
  phi <- pow(p.phi,-0.5)
  p.phi <- p.phi1/(1-patom.phi)
  patom.phi ~ dbeta(1,1)

```

```
# Parameters to monitor  
q[1] <- b0  
q[2] <- exp(b0)  
q[3] <- kappa  
q[4] <- phi
```

```
}
```

## WinBUGS code for multivariable analyses (Model B) for estimation of average bias and between and within meta-analysis heterogeneity

```

model{
  for (i in 1:N) {
    r[i] ~ dbin(p[i],n[i])                # likelihood

    logit(p[i]) <- mu[s[i]] + treat[i]*(delta[i] + beta1[i]*seq1[i] + beta2[i]*alloc1[i] + beta3[i]*blind1[i] + beta4[i]*incomp1[i]) # model

    beta1[i]~dnorm(b1[ma[i]],p.ka1[ma[i]])I(-10,10) # between study, within MA, variation in bias
    beta2[i]~dnorm(b2[ma[i]],p.ka2[ma[i]])I(-10,10) # between study, within MA, variation in bias
    beta3[i]~dnorm(b3[ma[i]],p.ka3[ma[i]])I(-10,10) # between study, within MA, variation in bias
    beta4[i]~dnorm(b4[ma[i]],p.ka4[ma[i]])I(-10,10) # between study, within MA, variation in bias

    delta[i]~dnorm(d[ma[i]],p.d[ma[i]])I(-10,10) # RE for treatment effect within meta-analysis
    rhat[i] <- p[i] * n[i] # calculate residual deviance
    dev[i] <- 2 * (r[i] * (log(r[i])-log(rhat[i])) + (n[i]-r[i]) * (log(n[i]-r[i]) - log(n[i]-rhat[i])))
  }
  resdev <- sum(dev[])

  for (j in 1:N_trial) {mu[j] ~ dnorm(0,.01)} # priors for study baseline effects - unrelated

  for (m in 1:N_ma) {
    d[m] ~ dnorm(0,.01) # priors for true fixed (unrelated) treatment effects
    b1[m] ~ dnorm(b01,p.phi1) # between meta-analysis variation in mean bias
    b2[m] ~ dnorm(b02,p.phi2) # between meta-analysis variation in mean bias
    b3[m] ~ dnorm(b03,p.phi3) # between meta-analysis variation in mean bias
    b4[m] ~ dnorm(b04,p.phi4) # between meta-analysis variation in mean bias
    var_d[m]~dlnorm(-2.56,0.33) # generic informative prior for between-trial variances
    p.d[m]<- 1/var_d[m]
    p.ka1[m] <- p.k1*equals(kappa_ok1[m],1) + cut(p.k1)*equals(kappa_ok1[m],0)
    p.ka2[m] <- p.k2*equals(kappa_ok2[m],1) + cut(p.k2)*equals(kappa_ok2[m],0)
    p.ka3[m] <- p.k3*equals(kappa_ok3[m],1) + cut(p.k3)*equals(kappa_ok3[m],0)
    p.ka4[m] <- p.k4*equals(kappa_ok4[m],1) + cut(p.k4)*equals(kappa_ok4[m],0)
  }
}

```

```
b01 ~ dnorm(0,.001)
b02 ~ dnorm(0,.001)
b03 ~ dnorm(0,.001)
b04 ~ dnorm(0,.001)
```

```
# vague prior for overall mean bias
```

```
p.kz1~dgamma(.01,.01)
kappa1 <- pow(p.k1,-0.5)
p.k1<-p.kz1/(1-patom.k1)
patom.k1~dbeta(1,1)
```

```
p.kz2~dgamma(.01,.01)
kappa2 <- pow(p.k2,-0.5)
p.k2<-p.kz2/(1-patom.k2)
patom.k2~dbeta(1,1)
```

```
p.kz3~dgamma(.01,.01)
kappa3 <- pow(p.k3,-0.5)
p.k3<-p.kz3/(1-patom.k3)
patom.k3~dbeta(1,1)
```

```
p.kz4~dgamma(.01,.01)
kappa4 <- pow(p.k4,-0.5)
p.k4<-p.kz4/(1-patom.k4)
patom.k4~dbeta(1,1)
```

```
p.phiz1~dgamma(.01,.01)
phi1 <- pow(p.phi1,-0.5)
p.phi1<-p.phiz1/(1-patom.phi1)
patom.phi1~dbeta(1,1)
```

```
p.phiz2~dgamma(.01,.01)
phi2 <- pow(p.phi2,-0.5)
p.phi2<-p.phiz2/(1-patom.phi2)
patom.phi2~dbeta(1,1)
```

```
p.phiz3~dgamma(.01,.01)
phi3 <- pow(p.phi3,-0.5)
p.phi3<-p.phiz3/(1-patom.phi3)
patom.phi3~dbeta(1,1)
```

```
p.phiz4~dgamma(.01,.01)
phi4 <- pow(p.phi4,-0.5)
p.phi4<-p.phiz4/(1-patom.phi4)
patom.phi4~dbeta(1,1)
```

```
# Parameters to monitor
```

```
qf[1] <- b01
qf[2] <- b02
qf[3] <- b03
qf[4] <- b04
qf[5] <- exp(b01)
qf[6] <- exp(b02)
qf[7] <- exp(b03)
qf[8] <- exp(b04)
```

```
qr[1] <- kappa1
qr[2] <- kappa2
qr[3] <- kappa3
qr[4] <- kappa4
qr[5] <- phi1
qr[6] <- phi2
qr[7] <- phi3
qr[8] <- phi4
```

```
}
```

## WinBUGS code for multivariable analyses with interaction terms (Model C), allowing for interactions between sequence generation, allocation concealment and blinding

```

model{
  for (i in 1:N) {
    r[i] ~ dbin(p[i],n[i])          # likelihood

#model
    logit(p[i]) <- mu[s[i]] + treat[i]*(delta[i] + beta1[i]*seq1[i] + beta2[i]*alloc1[i] + beta3[i]*blind1[i] + beta4[i]*incomp1[i] +
    gamma[i,1]*alloc1[i]*blind1[i] + gamma[i,2]*alloc1[i]*seq1[i] + gamma[i,3]*blind1[i]*seq1[i])

    beta1[i]~dnorm(b1[ma[i]],p.ka1[ma[i]])I(-10,10)  # between study, within MA, variation in bias
    beta2[i]~dnorm(b2[ma[i]],p.ka2[ma[i]])I(-10,10)  # between study, within MA, variation in bias
    beta3[i]~dnorm(b3[ma[i]],p.ka3[ma[i]])I(-10,10)  # between study, within MA, variation in bias
    beta4[i]~dnorm(b4[ma[i]],p.ka4[ma[i]])I(-10,10)  # between study, within MA, variation in bias

    for(z in 1:3){
      gamma[i,z]~dnorm(bi[ma[i],z], pi.ka[ma[i],z])I(-10,10)
    }

    delta[i]~dnorm(d[ma[i]],p.d[ma[i]])I(-10,10)      # RE for treatment effect within meta-analysis
    rhat[i] <- p[i] * n[i]                            # calculate residual deviance
    dev[i] <- 2 * (r[i] * (log(r[i])-log(rhat[i])) + (n[i]-r[i]) * (log(n[i]-r[i]) - log(n[i]-rhat[i])))
    }
    resdev <- sum(dev[])

    for (j in 1:N_trial) {mu[j] ~ dnorm(0,.01)}        # priors for study baseline effects - unrelated

    for (m in 1:N_ma) {
      d[m] ~ dnorm(0,.01)                             # priors for true fixed (unrelated) treatment effects
      b1[m] ~ dnorm(b01,p.phi1)                       # between meta-analysis variation in mean bias
      b2[m] ~ dnorm(b02,p.phi2)                       # between meta-analysis variation in mean bias
      b3[m] ~ dnorm(b03,p.phi3)                       # between meta-analysis variation in mean bias
      b4[m] ~ dnorm(b04,p.phi4)                       # between meta-analysis variation in mean bias
    }
  }

```

```

for(z in 1:3){
  bi[m, z] ~ dnorm(bi0[z], pi.phi[z])
}

var_d[m]~dlnorm(-2.56,0.33) # generic informative prior for between-trial variances
p.d[m]<- 1/var_d[m]
p.ka1[m] <- p.k1*equals(kappa_ok1[m],1) + cut(p.k1)*equals(kappa_ok1[m],0)
p.ka2[m] <- p.k2*equals(kappa_ok2[m],1) + cut(p.k2)*equals(kappa_ok2[m],0)
p.ka3[m] <- p.k3*equals(kappa_ok3[m],1) + cut(p.k3)*equals(kappa_ok3[m],0)
p.ka4[m] <- p.k4*equals(kappa_ok4[m],1) + cut(p.k4)*equals(kappa_ok4[m],0)

# Only informative if both interacting variables informative
pi.ka[m,1]<-pi.k[1]*equals(kappa_ok2[m],1)*equals(kappa_ok3[m],1) + cut(pi.k[1])*(1-
(equals(kappa_ok2[m],1)*equals(kappa_ok3[m],1)))
pi.ka[m,2]<-pi.k[2]*equals(kappa_ok2[m],1)*equals(kappa_ok1[m],1) + cut(pi.k[2])*(1-
(equals(kappa_ok2[m],1)*equals(kappa_ok1[m],1)))
pi.ka[m,3]<-pi.k[3]*equals(kappa_ok3[m],1)*equals(kappa_ok1[m],1) + cut(pi.k[3])*(1-
(equals(kappa_ok3[m],1)*equals(kappa_ok1[m],1)))

}

b01 ~ dnorm(0,.001) # vague prior for overall mean bias
b02 ~ dnorm(0,.001) # vague prior for overall mean bias
b03 ~ dnorm(0,.001) # vague prior for overall mean bias
b04 ~ dnorm(0,.001) # vague prior for overall mean bias

for(z in 1:3){
  bi0[z] ~ dnorm(0,.001)
}

p.kz1~dgamma(.01,.01)
kappa1 <- pow(p.k1,-0.5)
p.k1<-p.kz1/(1-patom.k1)
patom.k1~dbeta(1,1)

p.kz2~dgamma(.01,.01)

```



```
kappa2 <- pow(p.k2,-0.5)
p.k2<-p.kz2/(1-patom.k2)
patom.k2~dbeta(1,1)
```

```
p.kz3~dgamma(.01,.01)
kappa3 <- pow(p.k3,-0.5)
p.k3<-p.kz3/(1-patom.k3)
patom.k3~dbeta(1,1)
```

```
p.kz4~dgamma(.01,.01)
kappa4 <- pow(p.k4,-0.5)
p.k4<-p.kz4/(1-patom.k4)
patom.k4~dbeta(1,1)
```

```
for(z in 1:3){
  pi.kz[z]~dgamma(.01,.01)
  kappai[z]<-pow(pi.k[z],-0.5)
  pi.k[z]<-pi.kz[z]/(1-i.patom.k[z])
  i.patom.k[z]~dbeta(1,1)
}
```

```
p.phiz1~dgamma(.01,.01)
phi1 <- pow(p.phi1,-0.5)
p.phi1<-p.phiz1/(1-patom.phi1)
patom.phi1~dbeta(1,1)
```

```
p.phiz2~dgamma(.01,.01)
phi2 <- pow(p.phi2,-0.5)
p.phi2<-p.phiz2/(1-patom.phi2)
patom.phi2~dbeta(1,1)
```

```
p.phiz3~dgamma(.01,.01)
phi3 <- pow(p.phi3,-0.5)
p.phi3<-p.phiz3/(1-patom.phi3)
patom.phi3~dbeta(1,1)
```

```

p.phiz4~dgamma(.01,.01)
phi4 <- pow(p.phi4,-0.5)
p.phi4<-p.phiz4/(1-patom.phi4)
patom.phi4~dbeta(1,1)

for(z in 1:3){
  pi.phiz[z]~dgamma(.01,.01)
  i.phi[z]<-pow(pi.phi[z],-0.5)
  pi.phi[z]<-pi.phiz[z]/(1-i.patom.phi[z])
  i.patom.phi[z]~dbeta(1,1)
}

# Parameters to monitor
qf[1] <- b01
qf[2] <- b02
qf[3] <- b03
qf[4] <- b04
qf[5] <- exp(b01)
qf[6] <- exp(b02)
qf[7] <- exp(b03)
qf[8] <- exp(b04)

for(z in 1:3){
  exp.bi0[z]<-exp(bi0[z])
}

bias.alloc.blind<-b02+b03+bi0[1]
bias.alloc.seq<-b02+b03+bi0[2]
bias.blind.seq<-b03+b01+bi0[3]

ror.bias.alloc.blind<-exp(bias.alloc.blind)
ror.bias.alloc.seq<-exp(bias.alloc.seq)
ror.bias.blind.seq<-exp(bias.blind.seq)

qr[1] <- kappa1
qr[2] <- kappa2
qr[3] <- kappa3

```

```
qr[4] <- kappa4  
qr[5] <- phi1  
qr[6] <- phi2  
qr[7] <- phi3  
qr[8] <- phi4
```

```
}
```

## Web Appendix 3: Included Reviews and Meta-Analyses

| Cochrane review number | Review Title                                                                                                                          | Cochrane Library Issue; Year | Review DOI                     | MA No.* | Experimental intervention               | Comparison intervention    | Outcome                                                                              |
|------------------------|---------------------------------------------------------------------------------------------------------------------------------------|------------------------------|--------------------------------|---------|-----------------------------------------|----------------------------|--------------------------------------------------------------------------------------|
| CD000012               | Alternative versus conventional institutional settings for birth                                                                      | Issue 1; 2005                | 10.1002/14651858.CD000012.pub2 | 1.06    | Alternative birth setting               | Conventional birth setting | Spontaneous vaginal birth                                                            |
| CD000019               | Thyrotropin-releasing hormone added to corticosteroids for women at risk of preterm birth for preventing neonatal respiratory disease | Issue 2; 2004                | 10.1002/14651858.CD000019.pub2 | 1.01    | TRH+steroids                            | Steroids                   | Death prior to hospital discharge                                                    |
| CD000023               | Antibiotics for sore throat                                                                                                           | Issue 4; 2006                | 10.1002/14651858.CD000023.pub3 | 1.04    | Antibiotics                             | Placebo                    | Incidence of otitis media within 14 days. Otitis media defined by clinical diagnosis |
| CD000028               | Pharmacotherapy for hypertension in the elderly                                                                                       | Issue 4; 2009                | 10.1002/14651858.CD000028.pub2 | 1.02    | Antihypertensive drug therapy           | Placebo/no treatment       | Cardiovascular mortality and morbidity                                               |
| CD000032               | Energy and protein intake in pregnancy                                                                                                | Issue 4; 2003                | 10.1002/14651858.CD000032      | 2.02    | Balanced protein/energy supplementation | No supplementation         | Preterm birth                                                                        |
| CD000051               | Cephalic version by postural management for breech presentation                                                                       | Issue 3; 2000                | 10.1002/14651858.CD000051      | 1.01    | Cephalic version by postural management | No treatment               | Non-cephalic births                                                                  |
| CD000059               | Clozapine versus typical neuroleptic medication for schizophrenia                                                                     | Issue 1; 2009                | 10.1002/14651858.CD000059.pub2 | 1.03    | Clozapine                               | Typical drugs              | Global impression: 1. Not clinically improved                                        |
| CD000083               | External cephalic version for breech presentation at term                                                                             | Issue 1; 1996                | 10.1002/14651858.CD000083      | 1.01    | External cephalic version               | No treatment               | Non-cephalic births                                                                  |
| CD000088               | Family intervention for schizophrenia                                                                                                 | Issue 4; 2006                | 10.1002/14651858.CD000088.pub2 | 1.04    | Family intervention                     | Standard care              | Global state: 1. Relapse                                                             |
| CD000110               | Hospitalisation and bed rest for multiple pregnancy                                                                                   | Issue 3; 1997                | 10.1002/14651858.CD000110      | 1.09    | Hospitalisation for bed rest            | No hospitalisation         | Low birthweight (< 2500 g)                                                           |
| CD000139               | Prophylactic methylxanthines for endotracheal extubation in preterm infants                                                           | Issue 12; 2010               | 10.1002/14651858.CD000139.pub2 | 1.01    | Methylxanthine                          | Placebo/no treatment       | Failed extubation                                                                    |
| CD000140               | Methylxanthine treatment for apnoea in preterm infants                                                                                | Issue 12; 2010               | 10.1002/14651858.CD000140.pub2 | 1.01    | Methylxanthine                          | Placebo/no treatment       | Failed apnoea reduction after 2 - 7 days                                             |
| CD000164               | Phenobarbital prior to preterm birth for preventing neonatal periventricular haemorrhage                                              | Issue 1; 2010                | 10.1002/14651858.CD000164.pub2 | 1.03    | Phenobarbital                           | Control                    | Perinatal mortality                                                                  |
| CD000174               | Prophylactic intravenous indomethacin for preventing mortality and morbidity in preterm infants                                       | Issue 3; 2002                | 10.1002/14651858.CD000174      | 1.12    | Prophylactic indomethacin               | Placebo or no treatment    | Severe IVH (grades III - IV)                                                         |

|          |                                                                                                          |                |                                |       |                                   |                                                     |                                                                                        |
|----------|----------------------------------------------------------------------------------------------------------|----------------|--------------------------------|-------|-----------------------------------|-----------------------------------------------------|----------------------------------------------------------------------------------------|
| CD000198 | Support during pregnancy for women at increased risk of low birthweight babies                           | Issue 3; 2003  | 10.1002/14651858.CD000198      | 1.06  | Additional support                | Usual care                                          | Gestational age < 37 weeks at birth                                                    |
| CD000209 | Vitamin E for neuroleptic-induced tardive dyskinesia                                                     | Issue 4; 2001  | 10.1002/14651858.CD000209      | 1.06  | Vitamin E                         | Placebo                                             | Any adverse effect                                                                     |
| CD000215 | Anthelmintics for people with neurocysticercosis                                                         | Issue 1; 2010  | 10.1002/14651858.CD000215.pub3 | 1.12  | Albendazole                       | No anthelmintic                                     | Seizures during treatment                                                              |
| CD000229 | Vitamin K prior to preterm birth for preventing neonatal periventricular haemorrhage                     | Issue 1; 2010  | 10.1002/14651858.CD000229.pub2 | 1.03  | Vitamin K                         | Control                                             | Severe (grades 3 and 4) PVH                                                            |
| CD000243 | Antibiotics for acute maxillary sinusitis                                                                | Issue 2; 2008  | 10.1002/14651858.CD000243.pub2 | 1.01  | Antibiotics                       | Placebo                                             | Clinical failure defined as a lack of cure or improvement at 7 to 15 days of follow up |
| CD000245 | Antibiotics for acute bronchitis                                                                         | Issue 4; 2004  | 10.1002/14651858.CD000245.pub2 | 3.01  | Antibiotic                        | Placebo                                             | Number of patients with productive cough                                               |
| CD000247 | Antibiotics for the common cold and acute purulent rhinitis                                              | Issue 3; 2005  | 10.1002/14651858.CD000247.pub2 | 1.01  | Antibiotic                        | Placebo                                             | Persisting symptoms 1 to 7 days                                                        |
| CD000313 | Discharge planning from hospital to home                                                                 | Issue 1; 2004  | 10.1002/14651858.CD000313.pub2 | 2.04  | Discharge planning                | Standard care with no structured discharge planning | Unscheduled readmission within 3 months of discharge from hospital                     |
| CD000329 | Endometrial resection and ablation versus hysterectomy for heavy menstrual bleeding                      | Issue 2; 1999  | 10.1002/14651858.CD000329      | 1.05  | TCRE/ablation                     | Hysterectomy                                        | Proportion requiring further surgery for HMB                                           |
| CD000361 | Intravenous immunoglobulin for preventing infection in preterm and/or low birth weight infants           | Issue 1; 2004  | 10.1002/14651858.CD000361.pub2 | 1.01  | IVIG                              | Placebo/no treatment                                | Sepsis, one or more episodes                                                           |
| CD000425 | Speech and language therapy for aphasia following stroke                                                 | Issue 5; 2010  | 10.1002/14651858.CD000425.pub2 | 1.13  | Speech & Language Therapy (SLT)   | No SLT                                              | Number of drop-outs (any reason)                                                       |
| CD000479 | Surgery or embolization for varicoceles in subfertile men                                                | Issue 1; 2009  | 10.1002/14651858.CD000479.pub4 | 1.01  | Varicocele occlusion              | No treatment                                        | Pregnancy rate                                                                         |
| CD000509 | Inhaled nitric oxide for respiratory failure in preterm infants                                          | Issue 3; 2007  | 10.1002/14651858.CD000509.pub3 | 1.01  | Inhaled NO                        | Placebo/no treatment                                | Death before discharge                                                                 |
| CD000511 | Prophylactic animal derived surfactant extract for preventing morbidity and mortality in preterm infants | Issue 4; 1997  | 10.1002/14651858.CD000511      | 1.08  | Animal derived surfactant extract | Placebo                                             | Effect on bronchopulmonary dysplasia                                                   |
| CD000941 | Vaginal misoprostol for cervical ripening and induction of labour                                        | Issue 1; 2003  | 10.1002/14651858.CD000941      | 1.06  | misoprostol                       | placebo                                             | Oxytocin augmentation                                                                  |
| CD000978 | Interventions for preventing oral mucositis for patients with cancer receiving treatment                 | Issue 12; 2010 | 10.1002/14651858.CD000978.pub4 | 3.03  | Amifostine                        | Placebo/no treatment                                | Mucositis (severe)                                                                     |
| CD000978 | Interventions for preventing oral mucositis for patients with cancer receiving treatment                 | Issue 12; 2010 | 10.1002/14651858.CD000978.pub4 | 8.03  | GM-CSF                            | Placebo/no treatment                                | Mucositis (severe)                                                                     |
| CD000978 | Interventions for preventing oral mucositis for patients with cancer receiving treatment                 | Issue 12; 2010 | 10.1002/14651858.CD000978.pub4 | 12.02 | Keratinocyte GF                   | Placebo                                             | Mucositis (moderate plus severe)                                                       |

|          |                                                                                                                              |               |                                |      |                                        |                                |                                                                                                |
|----------|------------------------------------------------------------------------------------------------------------------------------|---------------|--------------------------------|------|----------------------------------------|--------------------------------|------------------------------------------------------------------------------------------------|
| CD000994 | Home care by outreach nursing for chronic obstructive pulmonary disease                                                      | Issue 3; 2001 | 10.1002/14651858.CD000994      | 1.02 | Respiratory outreach nurse             | Routine care                   | Mortality                                                                                      |
| CD001008 | Hypnotherapy for smoking cessation                                                                                           | Issue 2; 1998 | 10.1002/14651858.CD001008      | 2.01 | Hypnotherapy                           | Attention/Advice               | smoking cessation at 6m+ follow up                                                             |
| CD001055 | Interventions for promoting smoking cessation during pregnancy                                                               | Issue 3; 1998 | 10.1002/14651858.CD001055.pub2 | 1.01 | All interventions to promote cessation | Control (routine care/placebo) | Continued smoking in late pregnancy                                                            |
| CD001058 | Antibiotics for preterm rupture of membranes                                                                                 | Issue 2; 2003 | 10.1002/14651858.CD001058      | 4.01 | Antibiotics                            | No antibiotic                  | Perinatal death/death before discharge                                                         |
| CD001059 | Calcium supplementation during pregnancy for preventing hypertensive disorders and related problems                          | Issue 8; 2010 | 10.1002/14651858.CD001059.pub3 | 1.02 | Calcium                                | Placebo                        | Pre-eclampsia                                                                                  |
| CD001079 | Prophylactic protein free synthetic surfactant for preventing morbidity and mortality in preterm infants                     | Issue 1; 2010 | 10.1002/14651858.CD001079.pub2 | 1.01 | Prophylactic synthetic surfactant      | Placebo                        | Neonatal mortality                                                                             |
| CD001100 | Fixed dose subcutaneous low molecular weight heparins versus adjusted dose unfractionated heparin for venous thromboembolism | Issue 9; 2010 | 10.1002/14651858.CD001100.pub3 | 1.02 | LMWH                                   | UFH                            | Incidence of recurrent venous thromboembolism at the end of follow up                          |
| CD001180 | Therapeutic ultrasound for venous leg ulcers                                                                                 | Issue 1; 2008 | 10.1002/14651858.CD001180.pub2 | 2.01 | High frequency ultrasound              | no ultrasound                  | Proportion of ulcers completely healed during study follow up (varying durations of follow up) |
| CD001218 | Acupuncture for migraine prophylaxis                                                                                         | Issue 1; 2009 | 10.1002/14651858.CD001218.pub2 | 2.01 | Acupuncture                            | Sham accupuncture              | Response                                                                                       |
| CD001239 | Intravenous immunoglobulin for suspected or subsequently proven infection in neonates                                        | Issue 1; 2004 | 10.1002/14651858.CD001239.pub2 | 1.01 | IVIG                                   | Placebo/no treatment           | Mortality from any cause                                                                       |
| CD001266 | Bronchodilators for bronchiolitis                                                                                            | Issue 3; 2006 | 10.1002/14651858.CD001266.pub2 | 1.04 | Bronchodilator                         | Placebo                        | Hospital admission after treatment (outpatients)                                               |
| CD001302 | Intra-venous fluids for the prevention of severe ovarian hyperstimulation syndrome                                           | Issue 2; 2002 | 10.1002/14651858.CD001302      | 1.01 | IV fluid                               | Placebo/no treatment           | Severe OHSS incidence per woman randomized                                                     |
| CD001364 | Zinc for the common cold                                                                                                     | Issue 2; 2011 | 10.1002/14651858.CD001364.pub3 | 2.13 | Zinc supplement                        | Placebo                        | Bad taste                                                                                      |
| CD001390 | Injectable vaccines for preventing pneumococcal infection in patients with chronic obstructive pulmonary disease             | Issue 4; 2006 | 10.1002/14651858.CD001390.pub2 | 1.01 | Pneumococcal Vaccine                   | Placebo/no treatment           | Pneumonia                                                                                      |
| CD001396 | Selective serotonin reuptake inhibitors for premenstrual syndrome                                                            | Issue 4; 2002 | 10.1002/14651858.CD001396      | 1.11 | SSRIs                                  | Placebo                        | Study withdrawal                                                                               |
| CD001423 | Serenoa repens for benign prostatic hyperplasia                                                                              | Issue 2; 2009 | 10.1002/14651858.CD001423.pub2 | 1.06 | SR                                     | Placebo                        | )                                                                                              |

|          |                                                                                            |               |                                |       |                                           |                                       |                                                                                                          |
|----------|--------------------------------------------------------------------------------------------|---------------|--------------------------------|-------|-------------------------------------------|---------------------------------------|----------------------------------------------------------------------------------------------------------|
| CD001446 | Corticosteroids for Guillain-Barre syndrome                                                | Issue 2; 2010 | 10.1002/14651858.CD001446.pub3 | 1.02  | CS                                        | Control                               | Improvement by one or more grades after four weeks                                                       |
| CD001501 | Endometrial resection / ablation techniques for heavy menstrual bleeding                   | Issue 4; 2009 | 10.1002/14651858.CD001501.pub3 | 13.02 | Second generation ENDOMETRIAL ABLATION    | First generation ENDOMETRIAL ABLATION | Satisfaction rate                                                                                        |
| CD001502 | Intra-uterine insemination versus fallopian tube sperm perfusion for non-tubal infertility | Issue 3; 2004 | 10.1002/14651858.CD001502.pub2 | 1.07  | Fallopian tube sperm perfusion            | Intrauterine insemination             | Sensitivity analysis: pregnancy rate per couple for non tubal subfertility (any duration of infertility) |
| CD001546 | Laparoscopic versus open surgery for suspected appendicitis                                | Issue 4; 2004 | 10.1002/14651858.CD001546.pub2 | 1.01  | Laparoscopic appendectomy                 | Conventional appendectomy             | Wound infections                                                                                         |
| CD001735 | Support surfaces for pressure ulcer prevention                                             | Issue 4; 2008 | 10.1002/14651858.CD001735.pub3 | 6.01  | Alternating-pressure                      | constant low-pressure                 | Pressure ulcer incidence                                                                                 |
| CD001867 | Opioid antagonists for alcohol dependence                                                  | Issue 1; 2005 | 10.1002/14651858.CD001867.pub2 | 1.01  | Naltrexone                                | Placebo                               | Return to heavy drinking                                                                                 |
| CD001869 | Antiviral treatment for Bell's palsy (idiopathic facial paralysis)                         | Issue 4; 2009 | 10.1002/14651858.CD001869.pub4 | 1.01  | Antivirals plus corticosteroid or placebo | corticosteroid or placebo             | Incomplete recovery at end of study                                                                      |
| CD001894 | Assisted hatching on assisted conception (IVF and ICSI)                                    | Issue 2; 2009 | 10.1002/14651858.CD001894.pub4 | 1.01  | Assisted hatching                         | No treatment                          | Live birth per woman randomised                                                                          |
| CD001942 | Corticosteroids for Bell's palsy (idiopathic facial paralysis)                             | Issue 2; 2009 | 10.1002/14651858.CD001942.pub3 | 1.01  | Corticosteroids                           | Placebo/no treatment                  | Incomplete recovery six months or more after randomisation                                               |
| CD001955 | Glucocorticoids for croup                                                                  | Issue 1; 2000 | 10.1002/14651858.CD001955.pub2 | 1.11  | Glucocorticoid                            | Placebo                               | Return visits and/or (re)admissions by glucocorticoid                                                    |
| CD002024 | Alpha 2 -adrenergic agonists for the management of opioid withdrawal                       | Issue 2; 2009 | 10.1002/14651858.CD002024.pub3 | 2.06  | Adrenergic                                | Methadone                             | Completion of treatment                                                                                  |
| CD002025 | Buprenorphine for the management of opioid withdrawal                                      | Issue 2; 2006 | 10.1002/14651858.CD002025.pub3 | 2.06  | Buprenorphine                             | Clonidine                             | Number completing withdrawal treatment                                                                   |
| CD002041 | Hyperbaric oxygen for carbon monoxide poisoning                                            | Issue 1; 2005 | 10.1002/14651858.CD002041.pub2 | 1.01  | Hyperbaric Oxygen (HBO)                   | Normobaric Oxygen (NBO)               | Presence of symptoms or signs at time of primary analysis (4-6 weeks)                                    |
| CD002047 | Leflunomide for the treatment of rheumatoid arthritis                                      | Issue 1; 2003 | 10.1002/14651858.CD002047      | 16.09 | leflunomide                               | MTX                                   | alopecia, leflunomide vs. MTX                                                                            |
| CD002063 | Intravenous immunoglobulin for Guillain-Barre syndrome                                     | Issue 1; 2006 | 10.1002/14651858.CD002063.pub3 | 2.02  | IVIg                                      | Plasma Exchange                       | Number improved by 1 or more disability grades after 4 weeks                                             |
| CD002120 | Oral contraceptive pill for primary dysmenorrhoea                                          | Issue 2; 2009 | 10.1002/14651858.CD002120.pub2 | 1.01  | Combined OCP                              | placebo or no treatment               | Pain improvement                                                                                         |

|          |                                                                                                                                                                             |               |                                |      |                                         |                                               |                                                                       |
|----------|-----------------------------------------------------------------------------------------------------------------------------------------------------------------------------|---------------|--------------------------------|------|-----------------------------------------|-----------------------------------------------|-----------------------------------------------------------------------|
| CD002130 | Platelet glycoprotein IIb/IIIa blockers during percutaneous coronary intervention and as the initial medical treatment of non-ST segment elevation acute coronary syndromes | Issue 4; 2001 | 10.1002/14651858.CD002130      | 1.01 | Platelet glycoprotein IIb/IIIa blockers | Placebo or usual care                         | 30-day mortality                                                      |
| CD002130 | Platelet glycoprotein IIb/IIIa blockers during percutaneous coronary intervention and as the initial medical treatment of non-ST segment elevation acute coronary syndromes | Issue 4; 2001 | 10.1002/14651858.CD002130      | 8.01 | Platelet glycoprotein lib/IIIa blockers | Placebo                                       | 30-day mortality                                                      |
| CD002243 | Corticosteroids for treating severe sepsis and septic shock                                                                                                                 | Issue 1; 2004 | 10.1002/14651858.CD002243.pub2 | 1.01 | Steroids                                | Standard therapy or placebo                   | 28-day all-cause mortality                                            |
| CD002250 | Prophylactic antibiotic administration during second and third trimester in pregnancy for preventing infectious morbidity and mortality                                     | Issue 4; 2002 | 10.1002/14651858.CD002250      | 1.04 | Prophylactic antibiotics                | Placebo                                       | Preterm delivery                                                      |
| CD002294 | Interventions for preoperative smoking cessation                                                                                                                            | Issue 7; 2010 | 10.1002/14651858.CD002294.pub3 | 1.01 | Any intervention to promote cessation   | Standard care                                 | Smoking cessation at time of surgery                                  |
| CD002770 | Mechanical ventilation for newborn infants with respiratory failure due to pulmonary disease                                                                                | Issue 4; 2002 | 10.1002/14651858.CD002770      | 1.01 | Mechanical ventilation                  | No mechanical ventilation (rescue MV allowed) | Any reported mortality                                                |
| CD002771 | Kangaroo mother care to reduce morbidity and mortality in low birthweight infants                                                                                           | Issue 2; 2003 | 10.1002/14651858.CD002771      | 1.04 | Kangaroo mother care                    | conventional neonatal care                    | Mortality at latest follow up                                         |
| CD002773 | Neuromuscular paralysis for newborn infants receiving mechanical ventilation                                                                                                | Issue 2; 2005 | 10.1002/14651858.CD002773.pub2 | 1.03 | Routine paralysis                       | no/selective paralysis                        | Pneumothorax (with or without pulmonary interstitial emphysema)       |
| CD002787 | Inhaled nitric oxide for acute respiratory distress syndrome (ARDS) and acute lung injury in children and adults                                                            | Issue 7; 2010 | 10.1002/14651858.CD002787.pub2 | 1.01 | Inhaled nitric oxide                    | Placebo or no intervention                    | Longest follow up mortality (complete case analysis): INO vs. control |
| CD002837 | Enteral versus parenteral nutrition for acute pancreatitis                                                                                                                  | Issue 1; 2010 | 10.1002/14651858.CD002837.pub2 | 1.01 | Enteral Nutrition                       | Total Parenteral nutrition                    | Mortality                                                             |
| CD002865 | Mifepristone for induction of labour                                                                                                                                        | Issue 4; 2000 | 10.1002/14651858.CD002865      | 1.03 | Mifepristone                            | placebo/no treatment                          | Caesarean section                                                     |
| CD002897 | Intraoperative Mitomycin C for glaucoma surgery                                                                                                                             | Issue 4; 2005 | 10.1002/14651858.CD002897.pub2 | 1.01 | Intraoperative Mitomycin C              | Placebo or no treatment                       | Failure at 12 months                                                  |
| CD002898 | Antiviral treatment and other therapeutic interventions for herpes simplex virus epithelial keratitis                                                                       | Issue 1; 2008 | 10.1002/14651858.CD002898.pub3 | 1.1  | Acyclovir                               | Idoxuridine                                   | Acyclovir versus idoxuridine: 7-day & 14-day healing                  |
| CD002898 | Antiviral treatment and other therapeutic interventions for herpes simplex virus epithelial keratitis                                                                       | Issue 1; 2008 | 10.1002/14651858.CD002898.pub3 | 1.15 | Acyclovir                               | Vidarabine                                    | Acyclovir versus vidarabine: 7-day & 14-day healing                   |
| CD002898 | Antiviral treatment and other therapeutic interventions for herpes simplex virus epithelial keratitis                                                                       | Issue 1; 2008 | 10.1002/14651858.CD002898.pub3 | 1.22 | Ganciclovir                             | Acyclovir                                     | Ganciclovir versus acyclovir: 7-day & 14-day healing                  |
| CD002907 | Antibiotic prophylaxis for cirrhotic patients with upper gastrointestinal bleeding                                                                                          | Issue 2; 2002 | 10.1002/14651858.CD002907      | 1.03 | Antibiotic                              | Control                                       | Bacterial infections                                                  |



|          |                                                                                                                                                                   |                |                                |      |                                    |                           |                                                                       |
|----------|-------------------------------------------------------------------------------------------------------------------------------------------------------------------|----------------|--------------------------------|------|------------------------------------|---------------------------|-----------------------------------------------------------------------|
| CD002958 | Early postnatal discharge from hospital for healthy mothers and term infants                                                                                      | Issue 3; 2002  | 10.1002/14651858.CD002958      | 1.06 | Early discharge                    | Standard discharge        | Proportion of women not breastfeeding in first eight weeks postpartum |
| CD003000 | Education interventions for adults who attend the emergency room for acute asthma                                                                                 | Issue 3; 2007  | 10.1002/14651858.CD003000.pub2 | 1.04 | Education                          | usual care                | Presentation at emergency department (end of follow up)               |
| CD003053 | Insulin-sensitising drugs (metformin, rosiglitazone, pioglitazone, D-chiro-inositol) for women with polycystic ovary syndrome, oligo amenorrhoea and subfertility | Issue 1; 2010  | 10.1002/14651858.CD003053.pub4 | 1.03 | Metformin                          | placebo or no treatment   | Ovulation rate                                                        |
| CD003101 | Vaginal prostaglandin (PGE2 and PGF2a) for induction of labour at term                                                                                            | Issue 4; 2003  | 10.1002/14651858.CD003101      | 1.02 | Prostaglandin E2                   | Placebo/No treatment      | Uterine hyperstimulation with FHR changes                             |
| CD003162 | The Epley (canalith repositioning) manoeuvre for benign paroxysmal positional vertigo                                                                             | Issue 2; 2004  | 10.1002/14651858.CD003162.pub2 | 1.01 | Epley Manoeuvre                    | Placebo Manoeuvre         | Subjective report of complete symptom resolution                      |
| CD003246 | Intravenous oxytocin alone for cervical ripening and induction of labour                                                                                          | Issue 3; 2001  | 10.1002/14651858.CD003246      | 1.03 | IV oxytocin                        | Placebo or exp management | Caesarean section                                                     |
| CD003281 | Stimulation of the wrist acupuncture point P6 for preventing postoperative nausea and vomiting                                                                    | Issue 2; 2009  | 10.1002/14651858.CD003281.pub3 | 1.02 | Acupoint P6 stimulation            | Sham                      | Vomiting                                                              |
| CD003331 | Exercise based rehabilitation for heart failure                                                                                                                   | Issue 3; 2004  | 10.1002/14651858.CD003331.pub2 | 1.01 | All exercise interventions         | Usual care                | All cause mortality up to 12 month follow up                          |
| CD003368 | Addition of drug/s to a chemotherapy regimen for metastatic breast cancer                                                                                         | Issue 11; 2010 | 10.1002/14651858.CD003368.pub3 | 4.01 | Control                            | Addition of a drug        | Treatment-related deaths (all trials)                                 |
| CD003481 | Ibuprofen for the treatment of patent ductus arteriosus in preterm and/or low birth weight infants                                                                | Issue 1; 2008  | 10.1002/14651858.CD003481.pub3 | 2.01 | Ibuprofen                          | Indomethacin              | Failure to close a PDA (after single or three doses)                  |
| CD003499 | Antiepileptics for aggression and associated impulsivity                                                                                                          | Issue 4; 2008  | 10.1002/14651858.CD003499.pub2 | 6.01 | Any epileptic drug                 | Placebo                   | Non-compliance: leaving the study early, any reason                   |
| CD003598 | Antihypertensive treatment for kidney transplant recipients                                                                                                       | Issue 3; 2009  | 10.1002/14651858.CD003598.pub2 | 1.03 | CCB                                | Placebo/no treatment      | Graft loss at last follow-up                                          |
| CD003626 | Bile acids for primary sclerosing cholangitis                                                                                                                     | Issue 2; 2003  | 10.1002/14651858.CD003626      | 1.01 | UDCA                               | placebo or no treatment   | Mortality at the end of treatment                                     |
| CD003666 | Volume-targeted versus pressure-limited ventilation in the neonate                                                                                                | Issue 3; 2005  | 10.1002/14651858.CD003666.pub2 | 1.01 | Volume targeted (newer technology) | Pressure limited          | Death in hospital                                                     |
| CD003670 | Gowning by attendants and visitors in newborn nurseries for prevention of neonatal morbidity and mortality                                                        | Issue 3; 2003  | 10.1002/14651858.CD003670      | 1.04 | No gown                            | Gown                      | Nasal colonisation                                                    |
| CD003677 | Surgical approach to hysterectomy for benign gynaecological disease                                                                                               | Issue 3; 2009  | 10.1002/14651858.CD003677.pub4 | 2.05 | Laparoscopic Hysterectomy          | Abdominal Hysterectomy    | Intraoperative visceral injury (dich)                                 |

|          |                                                                                                                                          |               |                                |      |                                                                              |                                         |                                                        |
|----------|------------------------------------------------------------------------------------------------------------------------------------------|---------------|--------------------------------|------|------------------------------------------------------------------------------|-----------------------------------------|--------------------------------------------------------|
| CD003678 | Pre and post-operative medical therapy for endometriosis surgery                                                                         | Issue 3; 2004 | 10.1002/14651858.CD003678.pub2 | 2.05 | Post-surgical medical therapy                                                | placebo or no treatment                 | Pregnancy                                              |
| CD003719 | Recombinant versus urinary human chorionic gonadotrophin for final oocyte maturation triggering in IVF and ICSI cycles                   | Issue 2; 2005 | 10.1002/14651858.CD003719.pub2 | 1.01 | recombinant hCG                                                              | urinary hCG                             | Ongoing pregnancy / live birth rate per woman          |
| CD003766 | Continuous support for women during childbirth                                                                                           | Issue 3; 2007 | 10.1002/14651858.CD003766.pub2 | 1.05 | Continuous support                                                           | Usual care                              | Spontaneous vaginal birth                              |
| CD003840 | Eradication therapy for peptic ulcer disease in Helicobacter pylori positive patients                                                    | Issue 2; 2006 | 10.1002/14651858.CD003840.pub4 | 1.01 | duodenal ulcer acute healing with H. pylori eradication + ulcer healing drug | ulcer healing drug alone                | Proportion not healed                                  |
| CD003897 | Interleukin 2 receptor antagonists for kidney transplant recipients                                                                      | Issue 1; 2010 | 10.1002/14651858.CD003897.pub3 | 1.04 | IL2Ra                                                                        | Placebo/no treatment                    | Acute rejection: clinically suspected or biopsy proven |
| CD004004 | Radiotherapy for neovascular age-related macular degeneration                                                                            | Issue 4; 2004 | 10.1002/14651858.CD004004.pub2 | 1.02 | Radiation therapy                                                            | No radiation                            | Three or more lines visual acuity lost at 12 months    |
| CD004015 | Lay health workers in primary and community health care for maternal and child health and the management of infectious diseases          | Issue 1; 2005 | 10.1002/14651858.CD004015.pub2 | 2.01 | Lay Health Workers                                                           | Usual care                              | Initiated Breastfeeding                                |
| CD004046 | Acupuncture for depression                                                                                                               | Issue 2; 2005 | 10.1002/14651858.CD004046.pub2 | 2.02 | Electro-acupuncture                                                          | Antidepressants (Sbgrp1: Amitriptyline) | Improvement in depression                              |
| CD004064 | Chemotherapy for advanced gastric cancer                                                                                                 | Issue 2; 2005 | 10.1002/14651858.CD004064.pub2 | 2.02 | Combination Chemo                                                            | Single-agent therapy                    | Tumour response                                        |
| CD004064 | Chemotherapy for advanced gastric cancer                                                                                                 | Issue 2; 2005 | 10.1002/14651858.CD004064.pub2 | 6.02 | Docetaxel regimens                                                           | Non-Docetaxel regimens                  | Tumour response                                        |
| CD004073 | Vitamin supplementation for preventing miscarriage                                                                                       | Issue 2; 2005 | 10.1002/14651858.CD004073.pub2 | 1.02 | Vitamin(s)                                                                   | No vitamins                             | Early or late miscarriage                              |
| CD004075 | Fetal pulse oximetry for fetal assessment in labour                                                                                      | Issue 2; 2007 | 10.1002/14651858.CD004075.pub3 | 3.25 | Fetal pulse oximetry (FPO) + conventional fetal monitoring (CTG)             | CTG only                                | Admission to neonatal intensive care unit              |
| CD004115 | Rectal 5-aminosalicylic acid for induction of remission in ulcerative colitis                                                            | Issue 2; 2003 | 10.1002/14651858.CD004115      | 1.01 | Rectal 5-ASA                                                                 | Placebo                                 | Symptomatic Improvement                                |
| CD004147 | Psychosocial combined with agonist maintenance treatments versus agonist maintenance treatments alone for treatment of opioid dependence | Issue 4; 2008 | 10.1002/14651858.CD004147.pub3 | 1.01 | Any Psychosocial+pharm                                                       | Pharm standard                          | Retention in treatment                                 |
| CD004275 | Additional bedtime H2-receptor antagonist for the control of nocturnal gastric acid breakthrough                                         | Issue 4; 2009 | 10.1002/14651858.CD004275.pub3 | 1.01 | H2-receptor antagonist                                                       | No treatment                            | Prevalence rate of nocturnal gastric acid breakthrough |
| CD004332 | Acamprosate for alcohol dependence                                                                                                       | Issue 9; 2010 | 10.1002/14651858.CD004332.pub2 | 1.01 | Acamprosate                                                                  | Placebo                                 | Return to any drinking                                 |
| CD004343 | Ethamsylate for the prevention of morbidity and mortality in preterm or very low birth weight infants                                    | Issue 3; 2003 | 10.1002/14651858.CD004343      | 1.02 | Ethamsylate                                                                  | Placebo                                 | Mortality to hospital discharge                        |

|          |                                                                                                           |               |                                |       |                                                |                                            |                                                                      |
|----------|-----------------------------------------------------------------------------------------------------------|---------------|--------------------------------|-------|------------------------------------------------|--------------------------------------------|----------------------------------------------------------------------|
| CD004388 | Human recombinant activated protein C for severe sepsis                                                   | Issue 1; 2008 | 10.1002/14651858.CD004388.pub3 | 1.09  | APC                                            | Placebo                                    | Serious bleeding events (days 0 to 28)                               |
| CD004401 | Antibiotics for the prevention of acute and chronic suppurative otitis media in children                  | Issue 4; 2006 | 10.1002/14651858.CD004401.pub2 | 1.01  | Antibiotic                                     | Placebo/no treatment/ineffective treatment | Prevention - any AOM or CSOM during intervention                     |
| CD004405 | Corticosteroids for acute bacterial meningitis                                                            | Issue 9; 2010 | 10.1002/14651858.CD004405.pub3 | 1.01  | Corticosteroids                                | Placebo/no treatment/standard care         | Mortality                                                            |
| CD004417 | Delayed antibiotics for respiratory infections                                                            | Issue 3; 2007 | 10.1002/14651858.CD004417.pub3 | 15.01 | Delayed antibiotics                            | Immediate antibiotics                      | Patient satisfaction: Delayed versus Immediate Antibiotics           |
| CD004434 | Endothelin receptor antagonists for pulmonary arterial hypertension                                       | Issue 3; 2006 | 10.1002/14651858.CD004434.pub3 | 1.02  | ERAs                                           | Placebo                                    | proportion of patients with improved functional class                |
| CD004437 | Thrombolytic therapy for pulmonary embolism                                                               | Issue 2; 2006 | 10.1002/14651858.CD004437.pub2 | 1.01  | Thrombolytic (rt-PA, streptokinase, urokinase) | Heparin                                    | All cause mortality                                                  |
| CD004472 | Preoperative intra-aortic balloon pumps in patients undergoing coronary artery bypass grafting            | Issue 1; 2007 | 10.1002/14651858.CD004472.pub2 | 1.01  | Preoperative IABP                              | No preop IABP (no treatment)               | In-hospital death                                                    |
| CD004509 | Testosterone for peri and postmenopausal women                                                            | Issue 4; 2005 | 10.1002/14651858.CD004509.pub2 | 14.11 | HRT + testosterone                             | HRT alone                                  | Discontinuation rate (sbgp 1: all studies)                           |
| CD004549 | Wound drainage for caesarean section                                                                      | Issue 1; 2005 | 10.1002/14651858.CD004549.pub2 | 1.02  | Drain                                          | No drain                                   | Wound complications                                                  |
| CD004661 | Magnesium sulphate for women at risk of preterm birth for neuroprotection of the fetus                    | Issue 1; 2009 | 10.1002/14651858.CD004661.pub3 | 1.01  | Magnesium                                      | No magnesium                               | Paediatric mortality (fetal and later)                               |
| CD004678 | Glatiramer acetate for multiple sclerosis                                                                 | Issue 1; 2004 | 10.1002/14651858.CD004678      | 3.03  | Glatiramer acetate                             | Placebo                                    | Adverse effects causing treatment withdrawal                         |
| CD004720 | Screening for prostate cancer                                                                             | Issue 3; 2006 | 10.1002/14651858.CD004720.pub2 | 1.01  | Screening                                      | No screening                               | Prostate cancer-specific mortality (sub-group analysis risk of bias) |
| CD004736 | Effects and safety of preventive oral iron or iron+folic acid supplementation for women during pregnancy  | Issue 3; 2006 | 10.1002/14651858.CD004736.pub2 | 1.09  | Daily iron alone                               | no iron/placebo                            | Anaemia at term (Hb less than 110 g/L) (ALL)                         |
| CD004816 | Statins for the primary prevention of cardiovascular disease                                              | Issue 1; 2011 | 10.1002/14651858.CD004816.pub4 | 2.04  | Statin Therapy Group                           | Usual Care or Placebo                      | Total Number of CHD Events                                           |
| CD004863 | Early erythropoietin for preventing red blood cell transfusion in preterm and/or low birth weight infants | Issue 3; 2006 | 10.1002/14651858.CD004863.pub2 | 1.01  | EPO                                            | placebo or no treatment                    | Use of one or more red blood cell transfusions (low                  |

|          |                                                                                                                                                   |                |                                |      |                                         |                                |  |                                                                                                     |
|----------|---------------------------------------------------------------------------------------------------------------------------------------------------|----------------|--------------------------------|------|-----------------------------------------|--------------------------------|--|-----------------------------------------------------------------------------------------------------|
|          |                                                                                                                                                   |                |                                |      |                                         |                                |  | and high dose of EPO)                                                                               |
| CD004868 | Late erythropoietin for preventing red blood cell transfusion in preterm and/or low birth weight infants                                          | Issue 3; 2006  | 10.1002/14651858.CD004868.pub2 | 1.01 | Late EPO                                | placebo or no intervention     |  | Use of one or more red blood cell transfusions (low and high dose of EPO)                           |
| CD004878 | Glucocorticoids for acute viral bronchiolitis in infants and young children                                                                       | Issue 10; 2010 | 10.1002/14651858.CD004878.pub3 | 1.01 | Glucocorticoid                          | Placebo                        |  | Admissions (days 1 and 7) (outpatients) - review primary outcome                                    |
| CD004888 | Antiviral treatment for chronic hepatitis C in patients with human immunodeficiency virus                                                         | Issue 1; 2010  | 10.1002/14651858.CD004888.pub2 | 1.01 | PEGinterferon + ribavirin               | Interferon + ribavirin         |  | Sustained virological response                                                                      |
| CD004907 | Package of care for active management in labour for reducing caesarean section rates in low-risk women                                            | Issue 4; 2008  | 10.1002/14651858.CD004907.pub2 | 1.01 | Active management                       | Routine care                   |  | Caesarean section rate - all women                                                                  |
| CD004958 | Single or double-level anterior interbody fusion techniques for cervical degenerative disc disease                                                | Issue 1; 2011  | 10.1002/14651858.CD004958.pub2 | 1.08 | Fusion + discectomy                     | discectomy alone               |  | No Fusion                                                                                           |
| CD005011 | Recombinant factor VIIa for the prevention and treatment of bleeding in patients without haemophilia                                              | Issue 2; 2007  | 10.1002/14651858.CD005011.pub2 | 3.01 | rFVIIa                                  | Placebo                        |  | Total thromboembolic events                                                                         |
| CD005044 | Quinine for muscle cramps                                                                                                                         | Issue 4; 2004  | 10.1002/14651858.CD005044      | 1.09 | Quinine                                 | Placebo                        |  | Participants suffering major adverse events                                                         |
| CD005052 | Shengmai (a traditional Chinese herbal medicine) for heart failure                                                                                | Issue 4; 2007  | 10.1002/14651858.CD005052.pub2 | 1.01 | Shengmai+usual                          | usual                          |  | Lack of improvement in heart failure ( NYHA class improved < I class or worsening of heart failure) |
| CD005128 | Interventions for preventing and treating kidney disease in Henoch-Schonlein Purpura (HSP)                                                        | Issue 3; 2009  | 10.1002/14651858.CD005128.pub2 | 1.01 | Prednisone                              | Placebo/supportive treatment   |  | Persistent kidney disease at any time after treatment                                               |
| CD005188 | Interventions to increase influenza vaccination rates of those 60 years and older in the community                                                | Issue 2; 2005  | 10.1002/14651858.CD005188      | 1.02 | Reminder & recall: phone call or letter | No intervention                |  | Increasing community demand                                                                         |
| CD005215 | Interventions for preventing unintended pregnancies among adolescents                                                                             | Issue 4; 2009  | 10.1002/14651858.CD005215.pub2 | 1.06 | Multiple Intervention                   | No intervention / routine care |  | Use of birth control methods-Individually RCT                                                       |
| CD005291 | Preimplantation genetic screening for abnormal number of chromosomes (aneuploidies) in in vitro fertilisation or intracytoplasmic sperm injection | Issue 1; 2006  | 10.1002/14651858.CD005291.pub2 | 1.01 | Preimplantation genetic screening       | No screening                   |  | Live birth rate per woman randomised                                                                |

|          |                                                                                                                                                                           |                |                                |      |                                       |                                  |                                                           |
|----------|---------------------------------------------------------------------------------------------------------------------------------------------------------------------------|----------------|--------------------------------|------|---------------------------------------|----------------------------------|-----------------------------------------------------------|
| CD005307 | Addition of long-acting beta2-agonists to inhaled steroids as first line therapy for persistent asthma in steroid-naive adults and children                               | Issue 4; 2009  | 10.1002/14651858.CD005307.pub2 | 1.01 | ICS + LABA                            | ICS alone                        | # patients with exacerbations requiring systemic steroids |
| CD005341 | Granulocyte transfusions for preventing infections in patients with neutropenia or neutrophil dysfunction                                                                 | Issue 3; 2005  | 10.1002/14651858.CD005341      | 1.01 | Granulocytes                          | No granulocytes                  | Overall mortality                                         |
| CD005354 | Recombinant versus urinary gonadotrophin for ovarian stimulation in assisted reproductive technology cycles                                                               | Issue 2; 2011  | 10.1002/14651858.CD005354.pub2 | 1.08 | rFSH                                  | Urinary gonadotrophins           | Clinical pregnancy by urinary gonadotrophin               |
| CD005415 | Proton pump inhibitor treatment initiated prior to endoscopic diagnosis in upper gastrointestinal bleeding                                                                | Issue 4; 2006  | 10.1002/14651858.CD005415.pub2 | 1.01 | Proton pump inhibitor                 | placebo, an H2RA or no treatment | Mortality - 30 days or at point closest to 30 days        |
| CD005431 | Medical interventions for traumatic hyphema                                                                                                                               | Issue 3; 2005  | 10.1002/14651858.CD005431      | 1.05 | Antifibrinolytics                     | Placebo                          | Risk of secondary hemorrhage                              |
| CD005442 | Bile acids for liver-transplanted patients                                                                                                                                | Issue 3; 2005  | 10.1002/14651858.CD005442      | 1.01 | bile acids                            | placebo/ no intervention         | All-cause mortality at maximum follow-up                  |
| CD005496 | Probiotics for prevention of necrotizing enterocolitis in preterm infants                                                                                                 | Issue 1; 2008  | 10.1002/14651858.CD005496.pub2 | 1.01 | Probiotics                            | Placebo or no treatment          | Severe necrotising enterocolitis (stage II-III)           |
| CD005535 | Addition of long-acting beta2-agonists to inhaled corticosteroids versus same dose inhaled corticosteroids for chronic asthma in adults and children                      | Issue 4; 2005  | 10.1002/14651858.CD005535      | 1.01 | LABA + ICS                            | ICS alone + placebo              | # patients with exacerbations requiring oral steroids     |
| CD005571 | Systemic antimicrobial prophylaxis for percutaneous endoscopic gastrostomy                                                                                                | Issue 4; 2006  | 10.1002/14651858.CD005571.pub2 | 3.01 | antibiotic                            | placebo/none/antiseptic          | Peristomal infection                                      |
| CD005967 | Artesunate versus quinine for treating severe malaria                                                                                                                     | Issue 4; 2007  | 10.1002/14651858.CD005967.pub2 | 1.01 | Artesunate                            | Quinine                          | Death: participant age                                    |
| CD005981 | Direct thrombin inhibitors versus vitamin K antagonists or low molecular weight heparins for prevention of venous thromboembolism following total hip or knee replacement | Issue 4; 2010  | 10.1002/14651858.CD005981.pub2 | 2.04 | Direct Thrombin Inhibitors (any dose) | LMWH                             | All-cause Mortality events combined doses in THR+TKR      |
| CD006009 | Dopamine agonists for restless legs syndrome                                                                                                                              | Issue 2; 2006  | 10.1002/14651858.CD006009      | 1.07 | Dopamine agonists                     | Placebo                          | Number of dropouts due to adverse events                  |
| CD006015 | Finasteride for benign prostatic hyperplasia                                                                                                                              | Issue 10; 2010 | 10.1002/14651858.CD006015.pub3 | 1.19 | Finasteride 5 mg                      | Placebo                          | Study discontinuations (f/u = 1 yr)                       |
| CD006103 | Nicotine receptor partial agonists for smoking cessation                                                                                                                  | Issue 12; 2010 | 10.1002/14651858.CD006103.pub4 | 1.01 | Varenicline (1.0mg 2/d)               | Placebo                          | Continuous abstinence at longest follow up (24+ weeks)    |
| CD006105 | Metformin treatment before and during IVF or ICSI in women with polycystic ovary syndrome                                                                                 | Issue 2; 2009  | 10.1002/14651858.CD006105.pub2 | 1.04 | Metformin                             | Placebo                          | Incidence of OHSS                                         |

|          |                                                                                                                                                 |               |                                |       |                                                              |                              |                                                                                           |
|----------|-------------------------------------------------------------------------------------------------------------------------------------------------|---------------|--------------------------------|-------|--------------------------------------------------------------|------------------------------|-------------------------------------------------------------------------------------------|
| CD006114 | Fluvoxamine versus other anti-depressive agents for depression                                                                                  | Issue 3; 2006 | 10.1002/14651858.CD006114      | 1.01  | Fluvoxamine                                                  | TCAs                         | Response (acute phase): Primary outcome                                                   |
| CD006117 | Sertraline versus other antidepressive agents for depression                                                                                    | Issue 1; 2010 | 10.1002/14651858.CD006117.pub3 | 1.01  | Sertraline                                                   | TCAs (Subgrp: amitriptyline) | Failure to respond at endpoint (6 - 12 weeks): Sertraline versus TCAs                     |
| CD006117 | Sertraline versus other antidepressive agents for depression                                                                                    | Issue 1; 2010 | 10.1002/14651858.CD006117.pub3 | 4.01  | Sertraline                                                   | TCAs (Subgrp: imipramine)    | Failure to remission at endpoint (6 - 12 weeks): Sertraline versus TCAs                   |
| CD006117 | Sertraline versus other antidepressive agents for depression                                                                                    | Issue 1; 2010 | 10.1002/14651858.CD006117.pub3 | 13.01 | Sertraline                                                   | TCAs (Subgrp: clomipramine)  | SE Participants with at least one TEAE (Treatment Emergent Adverse Event?)                |
| CD006353 | Use of plastic adhesive drapes during surgery for preventing surgical site infection                                                            | Issue 4; 2007 | 10.1002/14651858.CD006353.pub2 | 1.01  | Adhesive drape                                               | No adhesive drape            | Surgical site infection (all wound classifications)                                       |
| CD006369 | Oral paliperidone for schizophrenia                                                                                                             | Issue 2; 2008 | 10.1002/14651858.CD006369.pub2 | 1.01  | Paliperidone                                                 | Placebo                      | Leaving the study early                                                                   |
| CD006466 | Oral anticoagulation in patients with cancer who have no therapeutic or prophylactic indication for anticoagulation                             | Issue 2; 2007 | 10.1002/14651858.CD006466      | 1.02  | Warfarin                                                     | No warfarin                  | Death at 1 year                                                                           |
| CD006468 | Anticoagulation for patients with cancer and central venous catheters                                                                           | Issue 2; 2011 | 10.1002/14651858.CD006468.pub3 | 1.01  | Heparin                                                      | No heparin (no treatment)    | Death                                                                                     |
| CD006480 | Mono and multifaceted inhalant and/or food allergen reduction interventions for preventing asthma in children at high risk of developing asthma | Issue 3; 2009 | 10.1002/14651858.CD006480.pub2 | 1.02  | Allergen reduction interventions (Mono-faceted intervention) | Placebo or usual care        | Current diagnosis asthma (ITT)                                                            |
| CD006529 | Milnacipran versus other antidepressive agents for depression                                                                                   | Issue 2; 2007 | 10.1002/14651858.CD006529      | 10.01 | Milnacipran                                                  | TCAs                         | Dropouts due to inefficiency                                                              |
| CD006536 | Stem cell treatment for acute myocardial infarction                                                                                             | Issue 4; 2008 | 10.1002/14651858.CD006536.pub2 | 1.01  | BMSC (Stem cells)                                            | no BMSC                      | Mortality                                                                                 |
| CD006537 | Laser treatment of drusen to prevent progression to advanced age-related macular degeneration                                                   | Issue 2; 2007 | 10.1002/14651858.CD006537      | 1.01  | Photocoagulation                                             | No treatment                 | Development of CNV                                                                        |
| CD006626 | Risperidone versus other atypical antipsychotics for schizophrenia                                                                              | Issue 3; 2007 | 10.1002/14651858.CD006626      | 3.01  | RISPERIDONE                                                  | CLOZAPINE                    | Global state: 1a. No clinically significant response (as defined by the original studies) |
| CD006632 | Clinical pathways: effects on professional practice, patient outcomes, length of stay and hospital costs                                        | Issue 3; 2010 | 10.1002/14651858.CD006632.pub2 | 2.2   | Clinical pathway                                             | Usual care                   | Hospital readmission up to 6 months                                                       |

|          |                                                                                                                                                |               |                                |      |                                       |                                                       |                                                                                           |
|----------|------------------------------------------------------------------------------------------------------------------------------------------------|---------------|--------------------------------|------|---------------------------------------|-------------------------------------------------------|-------------------------------------------------------------------------------------------|
| CD006649 | Anticoagulation for the initial treatment of venous thromboembolism in patients with cancer                                                    | Issue 2; 2011 | 10.1002/14651858.CD006649.pub3 | 1.01 | LMWH                                  | UFH                                                   | Death at 3 months                                                                         |
| CD006652 | Parenteral anticoagulation in patients with cancer who have no therapeutic or prophylactic indication for anticoagulation                      | Issue 1; 2011 | 10.1002/14651858.CD006652.pub2 | 1.01 | Heparin                               | Placebo                                               | Mortality at 12 months                                                                    |
| CD006654 | Olanzapine versus other atypical antipsychotics for schizophrenia                                                                              | Issue 3; 2010 | 10.1002/14651858.CD006654.pub2 | 3.01 | OLANZAPINE                            | CLOZAPINE                                             | Global state: 1a. no clinically significant response (as defined by the original studies) |
| CD006690 | Chinese herbal medicines for people with impaired glucose tolerance or impaired fasting blood glucose                                          | Issue 3; 2007 | 10.1002/14651858.CD006690      | 1.02 | Herbs + lifestyle                     | Lifestyle alone                                       | Incidence of diabetes (n)                                                                 |
| CD006706 | Interventions for the prevention and treatment of herpes simplex virus in patients being treated for cancer                                    | Issue 3; 2007 | 10.1002/14651858.CD006706      | 1.03 | Aciclovir                             | Placebo                                               | Viral isolates (by mode of administration)                                                |
| CD006739 | Dipeptidyl peptidase-4 (DPP-4) inhibitors for type 2 diabetes mellitus                                                                         | Issue 2; 2008 | 10.1002/14651858.CD006739.pub2 | 1.02 | Sitagliptin                           | Placebo/another single hypoglycemic drug/no treatment | Adverse events [n]                                                                        |
| CD006739 | Dipeptidyl peptidase-4 (DPP-4) inhibitors for type 2 diabetes mellitus                                                                         | Issue 2; 2008 | 10.1002/14651858.CD006739.pub2 | 2.02 | Vildagliptin                          | Control                                               | Adverse events [n]                                                                        |
| CD006743 | Effect of early treatment with anti-hypertensive drugs on short and long-term mortality in patients with an acute cardiovascular event         | Issue 4; 2009 | 10.1002/14651858.CD006743.pub2 | 1.02 | Nitrates                              | Placebo/no treatment                                  | All-cause mortality at 10 days                                                            |
| CD006743 | Effect of early treatment with anti-hypertensive drugs on short and long-term mortality in patients with an acute cardiovascular event         | Issue 4; 2009 | 10.1002/14651858.CD006743.pub2 | 3.02 | Beta-blockers                         | Placebo/no treatment                                  | All-cause mortality at 10 days                                                            |
| CD006743 | Effect of early treatment with anti-hypertensive drugs on short and long-term mortality in patients with an acute cardiovascular event         | Issue 4; 2009 | 10.1002/14651858.CD006743.pub2 | 4.02 | Calcium-channel blockers              | Placebo/no treatment                                  | All-cause mortality at 10 days                                                            |
| CD006772 | Service organisation for the secondary prevention of ischaemic heart disease in primary care                                                   | Issue 4; 2007 | 10.1002/14651858.CD006772      | 1.15 | Control (normal care)                 | Intervention (Service organisation)                   | Prescribed anti-platelet medication at end of study                                       |
| CD006794 | Early amniotomy and early oxytocin for prevention of, or therapy for, delay in first stage spontaneous labour compared with routine care       | Issue 4; 2007 | 10.1002/14651858.CD006794      | 1.01 | Early amniotomy and early oxytocin    | routine care                                          | Caesarean section rate                                                                    |
| CD006804 | Miniport versus standard ports for laparoscopic cholecystectomy                                                                                | Issue 3; 2010 | 10.1002/14651858.CD006804.pub2 | 1.06 | Miniport-laparoscopic cholecystectomy | Standard port laparoscopic cholecystectomy            | Conversion to open cholecystectomy                                                        |
| CD006829 | Combined corticosteroid and long-acting beta-agonist in one inhaler versus long-acting beta-agonists for chronic obstructive pulmonary disease | Issue 4; 2007 | 10.1002/14651858.CD006829      | 1.03 | Combination inhalers (steroid + LABA) | Long-acting beta-agonists alone                       | Pneumonia                                                                                 |
| CD006849 | Platinum versus non-platinum chemotherapy regimens for small cell lung cancer                                                                  | Issue 4; 2008 | 10.1002/14651858.CD006849.pub2 | 1.01 | Platinum regime                       | Non-platinum regime                                   | 6-month survival                                                                          |

|          |                                                                                                   |               |                                |      |                                                                             |                                                                                                     |                                                                                                        |
|----------|---------------------------------------------------------------------------------------------------|---------------|--------------------------------|------|-----------------------------------------------------------------------------|-----------------------------------------------------------------------------------------------------|--------------------------------------------------------------------------------------------------------|
| CD006913 | Psychological interventions for treatment of inflammatory bowel disease                           | Issue 1; 2008 | 10.1002/14651858.CD006913      | 1.11 | Psychotherapy                                                               | no treatment/ other type of therapy, including other psychosocial / sham / standard medical therapy | Not in remission at/during month 9 to 18                                                               |
| CD006918 | Risperidone versus placebo for schizophrenia                                                      | Issue 1; 2008 | 10.1002/14651858.CD006918      | 1.06 | Risperidone                                                                 | Placebo                                                                                             | Mental state: 1c. No specific degree of response (<20% decrease PANSS/BPRS total change)               |
| CD006920 | Acupuncture and assisted conception                                                               | Issue 4; 2008 | 10.1002/14651858.CD006920.pub2 | 3.03 | Acupuncture                                                                 | No acupuncture                                                                                      | Clinical Pregnancy Rate                                                                                |
| CD006920 | Acupuncture and assisted conception                                                               | Issue 4; 2008 | 10.1002/14651858.CD006920.pub2 | 4.03 | Acupuncture                                                                 | Sham or no treatment                                                                                | Clinical pregnancy                                                                                     |
| CD006922 | Regular treatment with salmeterol and inhaled steroids for chronic asthma: serious adverse events | Issue 1; 2008 | 10.1002/14651858.CD006922      | 1.01 | Salmeterol and ICS                                                          | ICS                                                                                                 | All-cause mortality                                                                                    |
| CD006923 | Regular treatment with formoterol for chronic asthma: serious adverse events                      | Issue 4; 2008 | 10.1002/14651858.CD006923.pub2 | 2.01 | Formoterol                                                                  | Placebo                                                                                             | Non-fatal serious adverse events (adults & children)                                                   |
| CD007115 | Duloxetine for treating painful neuropathy or chronic pain                                        | Issue 4; 2009 | 10.1002/14651858.CD007115.pub2 | 3.06 | Duloxetine                                                                  | Placebo                                                                                             | Adverse event leading to cessation                                                                     |
| CD007125 | Multidisciplinary rehabilitation for older people with hip fractures                              | Issue 2; 2008 | 10.1002/14651858.CD007125      | 1.01 | Multidisciplinary inpatient rehabilitation                                  | Usual care                                                                                          | 'Poor outcome' (long-term follow-up)                                                                   |
| CD007187 | Blood pressure lowering efficacy of diuretics as second-line therapy for primary hypertension     | Issue 2; 2008 | 10.1002/14651858.CD007187      | 5.04 | Combination                                                                 | Monotherapy                                                                                         | Withdrawals due to adverse events                                                                      |
| CD007223 | Medical treatments for incomplete miscarriage (less than 24 weeks)                                | Issue 3; 2008 | 10.1002/14651858.CD007223      | 2.02 | Misoprostol                                                                 | Surgery                                                                                             | Surgical evacuation                                                                                    |
| CD007228 | Structured telephone support or telemonitoring programmes for patients with chronic heart failure | Issue 8; 2010 | 10.1002/14651858.CD007228.pub2 | 1.01 | structured telephone support                                                | Usual Care                                                                                          | All-cause mortality (full peer-reviewed publications only): structured telephone support vs usual care |
| CD007253 | Interventions for smoking cessation and reduction in individuals with schizophrenia               | Issue 6; 2010 | 10.1002/14651858.CD007253.pub2 | 1.01 | Bupropion                                                                   | Placebo                                                                                             | Abstinence at 6-month follow-up (primary outcome)                                                      |
| CD007275 | Effects of communicating DNA-based disease risk estimates on risk-reducing behaviours             | Issue 3; 2008 | 10.1002/14651858.CD007275      | 1.01 | Communicating DNA-based disease risk estimates to motivate behaviour change | No genetic tests risk estimates                                                                     | Smoking                                                                                                |
| CD007277 | Abatacept for rheumatoid arthritis                                                                | Issue 4; 2009 | 10.1002/14651858.CD007277.pub2 | 1.25 | Abatacept                                                                   | Placebo                                                                                             | All withdrawals                                                                                        |



|          |                                                                                                                               |                |                                |      |                                         |                                            |                                                                    |
|----------|-------------------------------------------------------------------------------------------------------------------------------|----------------|--------------------------------|------|-----------------------------------------|--------------------------------------------|--------------------------------------------------------------------|
| CD007339 | Pentoxifylline for alcoholic hepatitis                                                                                        | Issue 3; 2008  | 10.1002/14651858.CD007339      | 1.01 | Pentoxifylline                          | Placebo/no treatment                       | Mortality using the fixed effect model                             |
| CD007345 | Antibiotic prophylaxis for patients undergoing elective endoscopic retrograde cholangiopancreatography                        | Issue 10; 2010 | 10.1002/14651858.CD007345.pub2 | 1.02 | Antibiotic prophylaxis                  | Placebo                                    | Acute cholangitis                                                  |
| CD007411 | Antioxidants for male subfertility                                                                                            | Issue 1; 2011  | 10.1002/14651858.CD007411.pub2 | 1.02 | Antioxidants                            | No treatment/placebo                       | Pregnancy rate per couple randomised                               |
| CD007482 | Antibiotic prophylaxis versus no prophylaxis for preventing infection after cesarean section                                  | Issue 4; 2008  | 10.1002/14651858.CD007482      | 1.02 | Antibiotic                              | No antibiotic                              | Maternal wound infection                                           |
| CD007503 | Antidepressants for depression in physically ill people                                                                       | Issue 3; 2010  | 10.1002/14651858.CD007503.pub2 | 1.02 | Antidepressants                         | Placebo                                    | Response to treatment (6-8 weeks). Antidepressants versus placebo  |
| CD007613 | Erythropoiesis-stimulating agents for anaemia in chronic heart failure patients                                               | Issue 1; 2010  | 10.1002/14651858.CD007613.pub2 | 1.16 | Erythropoiesis-stimulating agents (ESA) | Control                                    | All-cause mortality                                                |
| CD007683 | Laparoscopy for the management of acute lower abdominal pain in women of childbearing age                                     | Issue 2; 2009  | 10.1002/14651858.CD007683      | 1.02 | Laparoscopic diagnosis                  | Open surgery diagnosis                     | Any adverse events                                                 |
| CD007710 | Pain relief for outpatient hysteroscopy                                                                                       | Issue 2; 2009  | 10.1002/14651858.CD007710      | 1.04 | Analgesic (sbgrp 1: Local Anaesthetics) | Placebo or no comparison                   | Vasovagal reaction (fainting)                                      |
| CD007749 | Antioxidant supplements for liver diseases                                                                                    | Issue 2; 2009  | 10.1002/14651858.CD007749      | 1.01 | Antioxidants                            | placebo or no intervention                 | All-cause mortality                                                |
| CD007780 | Cisapride for Intestinal Constipation                                                                                         | Issue 2; 2009  | 10.1002/14651858.CD007780      | 3.01 | Cisapride                               | Placebo                                    | Side effects                                                       |
| CD007781 | Laparoscopic versus open surgical techniques for ventral or incisional hernia repair                                          | Issue 2; 2009  | 10.1002/14651858.CD007781      | 1.01 | Laparoscopic repair                     | Conventional/open repair                   | Hernia recurrence                                                  |
| CD007798 | Clinically-indicated replacement versus routine replacement of peripheral venous catheters                                    | Issue 2; 2009  | 10.1002/14651858.CD007798      | 1.02 | Clinically indicated replacement        | Routine replacement                        | Phlebitis all studies                                              |
| CD007906 | Intensive case management for severe mental illness                                                                           | Issue 10; 2010 | 10.1002/14651858.CD007906.pub2 | 1.02 | INTENSIVE CASE MANAGEMENT               | STANDARD CARE                              | Service use: 2. Not remaining in contact with psychiatric services |
| CD007949 | Addition of long-acting beta-agonists to inhaled corticosteroids for chronic asthma in children                               | Issue 3; 2009  | 10.1002/14651858.CD007949      | 1.04 | LABA + ICS                              | ICS alone                                  | Total # withdrawals                                                |
| CD007950 | Effects and safety of periconceptional folate supplementation for preventing birth defects                                    | Issue 3; 2009  | 10.1002/14651858.CD007950      | 1.11 | Folic acid                              | No treatment/other micronutrients/placebo  | Miscarriage (ALL)                                                  |
| CD008046 | Gonadotropin-releasing hormone agonist versus HCG for oocyte triggering in antagonist assisted reproductive technology cycles | Issue 11; 2010 | 10.1002/14651858.CD008046.pub2 | 1.02 | GnRH agonist                            | HCG (standard medication for this purpose) | OHSS incidence per women randomised                                |

|          |                                                                                                                                                    |               |                           |       |                                                          |                                                        |                                                                                  |
|----------|----------------------------------------------------------------------------------------------------------------------------------------------------|---------------|---------------------------|-------|----------------------------------------------------------|--------------------------------------------------------|----------------------------------------------------------------------------------|
| CD008121 | Second-generation antipsychotics for major depressive disorder and dysthymia                                                                       | Issue 4; 2009 | 10.1002/14651858.CD008121 | 5.01  | Olanzapine (+ antidepressants)                           | Placebo (+antidepressants)                             | No clinically important response - as defined by original study                  |
| CD008141 | Second-generation antipsychotics for obsessive compulsive disorder                                                                                 | Issue 4; 2009 | 10.1002/14651858.CD008141 | 2.01  | Quetiapine (+antidepressants)                            | Placebo (+antidepressants)                             | No clinically important response to treatment (as defined by the original study) |
| CD008331 | Tocilizumab for rheumatoid arthritis                                                                                                               | Issue 1; 2010 | 10.1002/14651858.CD008331 | 14.02 | Placebo                                                  | Tocilizumab                                            | ACR 50% improvement                                                              |
| CD008370 | Somatostatin analogues for pancreatic surgery                                                                                                      | Issue 2; 2010 | 10.1002/14651858.CD008370 | 1.01  | Somatostatin analogues                                   | No Somatostatin analogues                              | Perioperative mortality                                                          |
| CD008407 | Paracetamol/acetaminophen (single administration) for perineal pain in the early postpartum period                                                 | Issue 3; 2010 | 10.1002/14651858.CD008407 | 1.01  | Paracetamol                                              | Placebo                                                | Adequate pain relief as reported by women                                        |
| CD008414 | Oral 5-aminosalicylic acid for maintenance of surgically-induced remission in Crohn's disease                                                      | Issue 3; 2010 | 10.1002/14651858.CD008414 | 1.01  | 5-ASA                                                    | Placebo                                                | Relapse, drop-outs classed as relapse, fixed effects model                       |
| CD008418 | Formoterol versus short-acting beta-agonists as relief medication for adults and children with asthma                                              | Issue 3; 2010 | 10.1002/14651858.CD008418 | 1.04  | Formoterol (long-acting BA)                              | Short-acting beta-agonist (standard relief medication) | Patients with a serious adverse event (all-cause)                                |
| CD008495 | Methotrexate monotherapy versus methotrexate combination therapy with non-biologic disease modifying anti-rheumatic drugs for rheumatoid arthritis | Issue 4; 2010 | 10.1002/14651858.CD008495 | 1.09  | Methotrexat + other non-biologic drugs                   | Methotrexate mono                                      | Combined withdrawal due to lack of efficacy or toxicity (stratified by regimen)  |
| CD008521 | Vaccines for preventing rotavirus diarrhoea: vaccines in use                                                                                       | Issue 5; 2010 | 10.1002/14651858.CD008521 | 1.13  | Rotarix                                                  | Placebo                                                | Serious adverse events                                                           |
| CD008521 | Vaccines for preventing rotavirus diarrhoea: vaccines in use                                                                                       | Issue 5; 2010 | 10.1002/14651858.CD008521 | 2.09  | RotaTeq                                                  | Placebo                                                | Reactogenicity: fever                                                            |
| CD008567 | General physical health advice for people with serious mental illness                                                                              | Issue 7; 2010 | 10.1002/14651858.CD008567 | 1.05  | PHYSICAL HEALTH ADVICE                                   | STANDARD CARE                                          | Leaving the study early                                                          |
| CD008603 | Oral vaccines for preventing cholera                                                                                                               | Issue 7; 2010 | 10.1002/14651858.CD008603 | 6.03  | Vaccine (Whole cell plus recombinant B subunit (WC-rBS)) | Placebo                                                | Adverse events (Subgroup 6.3.3: Diarrhoea)                                       |
| CD008603 | Oral vaccines for preventing cholera                                                                                                               | Issue 7; 2010 | 10.1002/14651858.CD008603 | 9.01  | Vaccine (Live attenuated vaccines: CVD 103-HgR)          | Placebo                                                | Adverse events (Subgroup 9.1.1: Diarrhoea)                                       |
| CD008960 | Phyllanthus species for chronic hepatitis B virus infection                                                                                        | Issue 1; 2011 | 10.1002/14651858.CD008960 | 1.04  | Phyllantus                                               | Control                                                | Number of patients with detectable serum HBeAg (end of treatment)                |

\* Meta-analysis number within the review (the first number refers to the comparison number and the second is the meta-analysis number within the comparison)

**Web Figure 2.** Number of Trials With Each Combination of the Four Risk of Bias Domain Judgements by Type of Outcome Measure

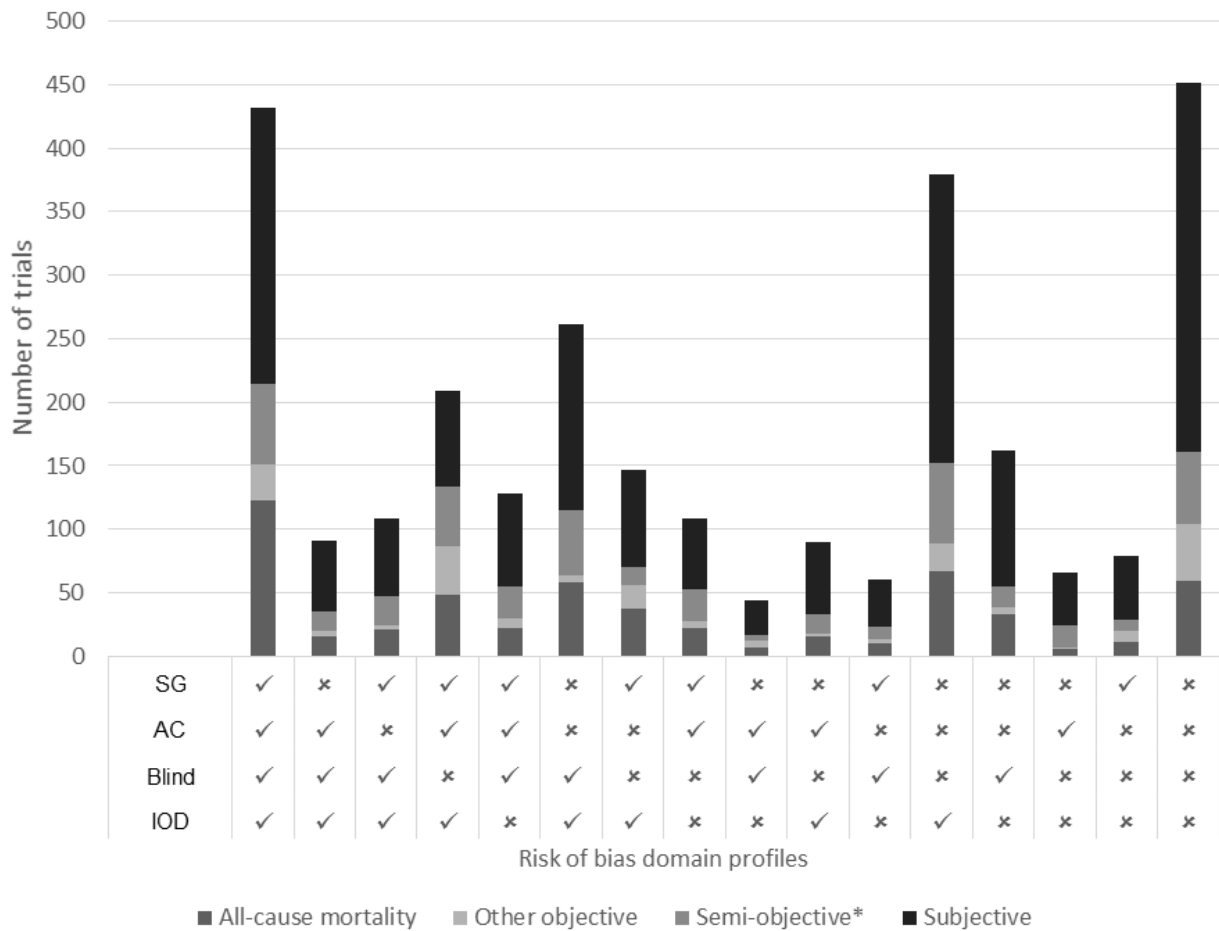

✓ = Low risk of bias; ✗ = High or unclear risk of bias; SG = Sequence generation; AC = Allocation concealment; Blind = Blinding; IOD = Incomplete outcome data. \* Semi-objective outcomes are those that are thought to be accurately assessed but potentially influenced by clinician/patient judgment (e.g. hospital admissions, duration of hospitalization, withdrawals, caesarian section etc.)

**Web Figure 3.** Estimated Ratios of Odds Ratios and Effects on Heterogeneity Associated With Risk of Bias Judgements for Each Domain Independently, According to Type of Outcome Measure: Univariable Analyses (Model A)

**High or unclear risk of bias for random sequence generation (versus low risk)**

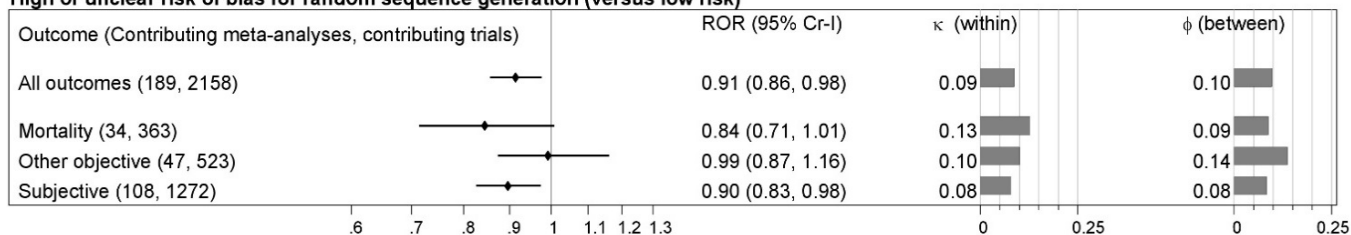

**High or unclear risk of bias for allocation concealment (versus low risk)**

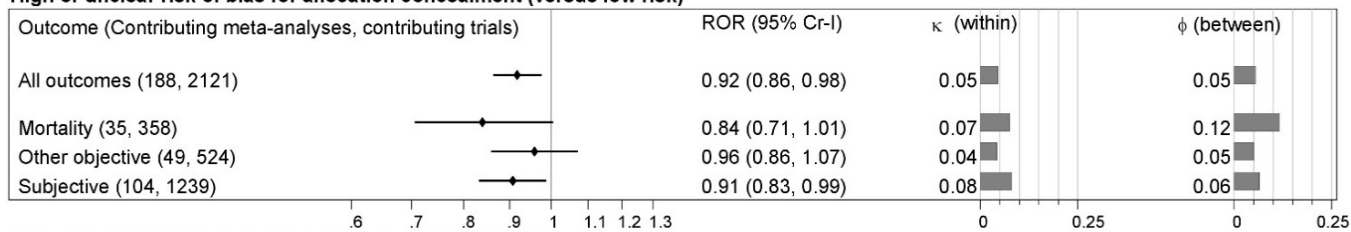

**High or unclear risk of bias for blinding (versus low risk)**

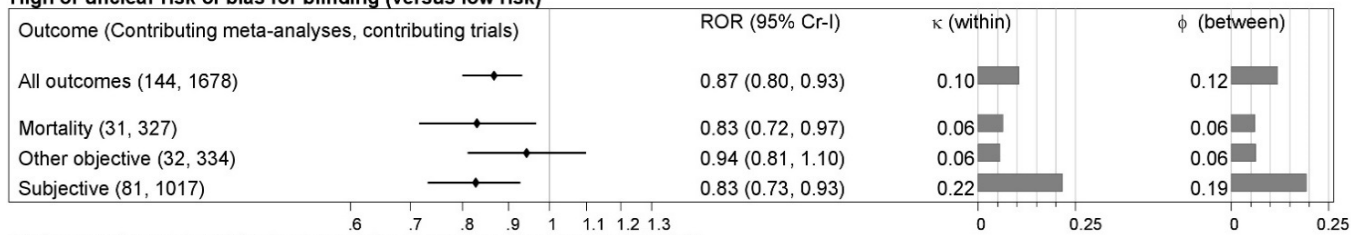

**High or unclear risk of bias for incomplete outcome data (versus low risk)**

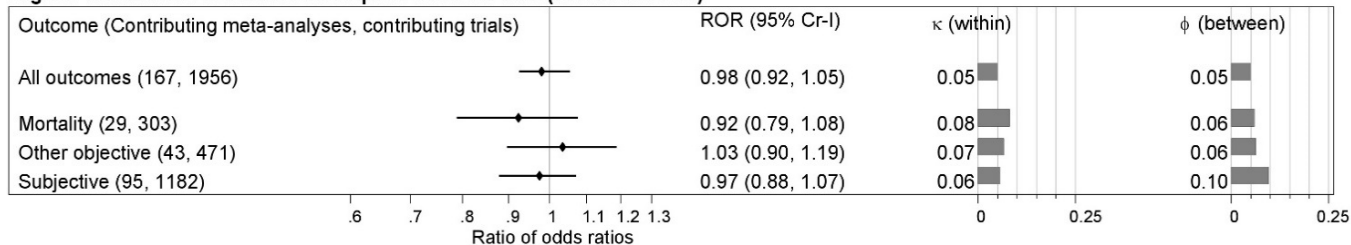

This figure corresponds to Table 4 in the main paper. Objective outcomes and semi-objective outcomes combined. ROR = ratio of risk ratios; CrI = credible interval;  $\kappa$  – measure of within meta-analysis heterogeneity;  $\phi$  – measure of between meta-analysis heterogeneity.

**Web Figure 4.** Estimated Ratios of Odds Ratios and Effects on Heterogeneity From Multivariable Analyses of Associations With Risk of Bias Judgements for Each Domain, Adjusted for the Effect of the Other Three Domains (Model B)

**High or unclear risk of bias for random sequence generation (versus low risk)**

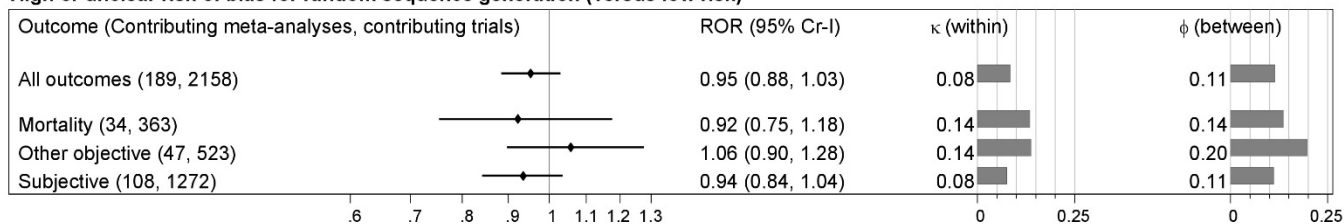

**High or unclear risk of bias for allocation concealment (versus low risk)**

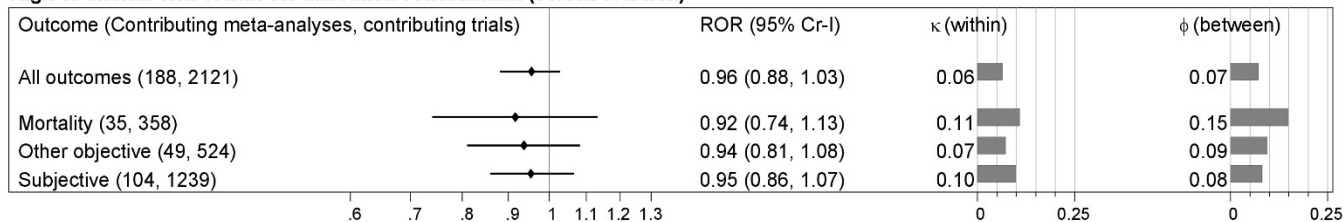

**High or unclear risk of bias for blinding (versus low risk)**

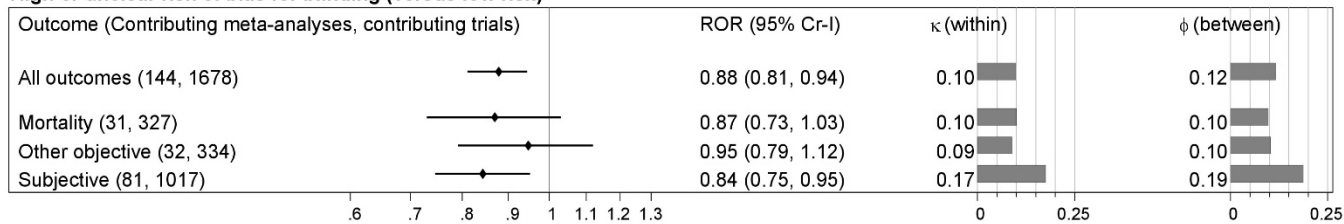

**High or unclear risk of bias for incomplete outcome data (versus low risk)**

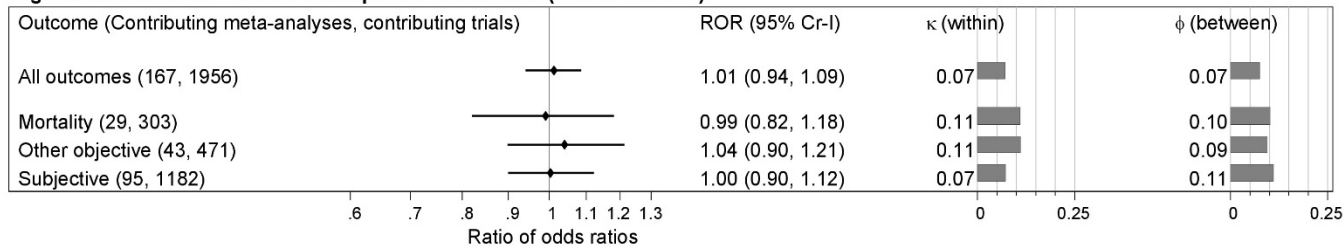

This figure corresponds to Table 5 in the main paper. Objective outcomes and semi-objective outcomes combined. Analyses for each bias domain were adjusted for risk of bias judgements for the other three domains. ROR = ratio of risk ratios; CrI = credible interval;  $\kappa$  – measure of within meta-analysis heterogeneity;  $\phi$  – measure of between meta-analysis heterogeneity.

**Web Table 1.** Estimated Ratios of Odds Ratios and Between-Meta-Analysis Heterogeneity in Mean Bias Associated With Risk of Bias Judgements, According to Type of Outcome Measure: Univariable Sensitivity Analyses for High Risk of Bias Compared to Low or Unclear Risk of Bias

| Risk-of-Bias Domain and Outcome                                     | Contributing Meta-Analyses (Trials) | Average Bias |            | Meta-Analyses Contributing to $\kappa$ Estimation | Within-Meta-Analysis Heterogeneity |            | Between-Meta-Analysis Heterogeneity |            |
|---------------------------------------------------------------------|-------------------------------------|--------------|------------|---------------------------------------------------|------------------------------------|------------|-------------------------------------|------------|
|                                                                     |                                     | ROR          | 95% CrI    |                                                   | $\kappa$                           | 95% CrI    | $\phi$                              | 95% CrI    |
| <i>All outcomes: High risk of bias vs. low/unclear risk of bias</i> |                                     |              |            |                                                   |                                    |            |                                     |            |
| Sequence generation                                                 | 39 (511)                            | 0.86         | 0.67, 1.09 | 12                                                | 0.35                               | 0.02, 0.77 | 0.32                                | 0.03, 0.67 |
| Allocation concealment                                              | 60 (790)                            | 0.92         | 0.78, 1.06 | 28                                                | 0.06                               | 0.01, 0.27 | 0.22                                | 0.03, 0.43 |
| Blinding                                                            | 117 (1358)                          | 0.87         | 0.79, 0.95 | 67                                                | 0.18                               | 0.02, 0.35 | 0.11                                | 0.01, 0.28 |
| Incomplete outcome data                                             | 116 (1465)                          | 1.06         | 0.97, 1.15 | 65                                                | 0.06                               | 0.01, 0.21 | 0.08                                | 0.01, 0.23 |

ROR = ratio of odds ratios; CrI = credible interval.

**Web Table 2.** Estimated Ratios of Odds Ratios and Between-Meta-Analysis Heterogeneity in Mean Bias Associated With Risk of Bias Judgements, According to Type of Outcome Measure: Univariable Sensitivity Analyses for Meta-Analyses With Other Objective and Semi-Objective Outcomes and for High Risk of Bias Compared to Low Or Unclear Risk of Bias

| Risk-of-Bias Domain and Outcome                                                | Contributing Meta-Analyses (Trials) | Average Bias |            | Meta-Analyses Contributing to $\kappa$ Estimation | Within-Meta-Analysis Heterogeneity |            | Between-Meta-Analysis Heterogeneity |            |
|--------------------------------------------------------------------------------|-------------------------------------|--------------|------------|---------------------------------------------------|------------------------------------|------------|-------------------------------------|------------|
|                                                                                |                                     | ROR          | 95% CrI    |                                                   | $\kappa$                           | 95% CrI    | $\phi$                              | 95% CrI    |
| <i>Sequence generation: High/unclear risk of bias vs. low risk of bias</i>     |                                     |              |            |                                                   |                                    |            |                                     |            |
| Other objective                                                                | 18 (187)                            | 0.85         | 0.67, 1.09 | 13                                                | 0.08                               | 0.01, 0.40 | 0.09                                | 0.01, 0.50 |
| Semi-objective                                                                 | 29 (336)                            | 1.08         | 0.91, 1.34 | 25                                                | 0.12                               | 0.01, 0.36 | 0.18                                | 0.02, 0.45 |
| <i>Allocation concealment: High/unclear risk of bias vs. low risk of bias</i>  |                                     |              |            |                                                   |                                    |            |                                     |            |
| Other objective                                                                | 17 (167)                            | 0.95         | 0.78, 1.15 | 14                                                | 0.06                               | 0.01, 0.25 | 0.07                                | 0.01, 0.36 |
| Semi-objective                                                                 | 32 (357)                            | 0.96         | 0.83, 1.12 | 26                                                | 0.05                               | 0.01, 0.17 | 0.07                                | 0.01, 0.28 |
| <i>Blinding: High/unclear risk of bias vs. low risk of bias</i>                |                                     |              |            |                                                   |                                    |            |                                     |            |
| Other objective                                                                | 13 (105)                            | 0.97         | 0.71, 1.31 | 12                                                | 0.08                               | 0.01, 0.39 | 0.11                                | 0.01, 0.61 |
| Semi-objective                                                                 | 19 (229)                            | 0.93         | 0.76, 1.12 | 12                                                | 0.06                               | 0.01, 0.24 | 0.07                                | 0.01, 0.36 |
| <i>Incomplete outcome data: High/unclear risk of bias vs. low risk of bias</i> |                                     |              |            |                                                   |                                    |            |                                     |            |
| Other objective                                                                | 16 (167)                            | 0.94         | 0.72, 1.22 | 10                                                | 0.08                               | 0.01, 0.40 | 0.08                                | 0.01, 0.47 |
| Semi-objective                                                                 | 27 (304)                            | 1.11         | 0.92, 1.30 | 18                                                | 0.08                               | 0.01, 0.31 | 0.06                                | 0.01, 0.29 |

ROR = ratio of odds ratios; CrI = credible interval.

**Web Table 3.** Estimated Ratios of Odds Ratios and Between-Meta-Analysis Heterogeneity in Mean Bias Associated With Risk of Bias Judgments, According to Type of Outcome Measure: Multivariable Analyses With Interactions

| Risk of Bias Domain and Outcome                                           | Average Bias |            | Meta-Analyses Contributing to $\kappa$ Estimation | Within-Meta-Analysis Heterogeneity |            | Between-Meta-Analysis Heterogeneity |            |
|---------------------------------------------------------------------------|--------------|------------|---------------------------------------------------|------------------------------------|------------|-------------------------------------|------------|
|                                                                           | ROR          | 95% CrI    |                                                   | $\kappa$                           | 95% CrI    | $\phi$                              | 95% CrI    |
| <i>Sequence Generation</i>                                                |              |            |                                                   |                                    |            |                                     |            |
| All                                                                       | 0.98         | 0.84, 1.11 | 142                                               | 0.06                               | 0.01, 0.16 | 0.09                                | 0.02, 0.22 |
| Mortality                                                                 | 1.08         | 0.75, 1.62 | 27                                                | 0.11                               | 0.03, 0.29 | 0.12                                | 0.02, 0.35 |
| Other objective/semi-objective                                            | 1.13         | 0.84, 1.64 | 38                                                | 0.11                               | 0.02, 0.29 | 0.17                                | 0.03, 0.41 |
| Subjective/Mixed                                                          | 0.94         | 0.79, 1.09 | 77                                                | 0.07                               | 0.02, 0.16 | 0.09                                | 0.02, 0.22 |
| <i>Allocation Concealment</i>                                             |              |            |                                                   |                                    |            |                                     |            |
| All                                                                       | 0.91         | 0.81, 1.03 | 139                                               | 0.06                               | 0.02, 0.14 | 0.08                                | 0.02, 0.16 |
| Mortality                                                                 | 0.85         | 0.59, 1.17 | 27                                                | 0.10                               | 0.02, 0.28 | 0.16                                | 0.03, 0.45 |
| Other objective/semi-objective                                            | 0.88         | 0.71, 1.16 | 40                                                | 0.07                               | 0.02, 0.18 | 0.10                                | 0.02, 0.26 |
| Subjective/Mixed                                                          | 0.92         | 0.80, 1.09 | 72                                                | 0.08                               | 0.02, 0.22 | 0.08                                | 0.01, 0.20 |
| <i>Blinding</i>                                                           |              |            |                                                   |                                    |            |                                     |            |
| All                                                                       | 0.92         | 0.84, 1.03 | 105                                               | 0.08                               | 0.02, 0.19 | 0.07                                | 0.02, 0.18 |
| Mortality                                                                 | 0.90         | 0.73, 1.13 | 25                                                | 0.09                               | 0.02, 0.25 | 0.10                                | 0.02, 0.30 |
| Other objective/semi-objective                                            | 0.99         | 0.82, 1.25 | 24                                                | 0.08                               | 0.01, 0.21 | 0.10                                | 0.02, 0.33 |
| Subjective/Mixed                                                          | 0.89         | 0.74, 1.03 | 56                                                | 0.11                               | 0.03, 0.27 | 0.13                                | 0.03, 0.29 |
| <i>Interaction Between Allocation Concealment and Sequence Generation</i> |              |            |                                                   |                                    |            |                                     |            |
| All                                                                       | 0.93         | 0.77, 1.16 | 109                                               | 0.09                               | 0.02, 0.20 | 0.09                                | 0.02, 0.20 |
| Mortality                                                                 | 0.81         | 0.43, 1.38 | 20                                                | 0.16                               | 0.03, 0.49 | 0.15                                | 0.03, 0.45 |
| Other objective/semi-objective                                            | 0.94         | 0.66, 1.57 | 32                                                | 0.09                               | 0.02, 0.26 | 0.12                                | 0.02, 0.35 |
| Subjective/Mixed                                                          | 0.89         | 0.70, 1.10 | 57                                                | 0.10                               | 0.01, 0.25 | 0.09                                | 0.02, 0.19 |
| <i>Interaction Between Allocation Concealment and Blinding</i>            |              |            |                                                   |                                    |            |                                     |            |
| All                                                                       | 0.84         | 0.74, 0.96 | 80                                                | 0.13                               | 0.02, 0.29 | 0.09                                | 0.02, 0.20 |
| Mortality                                                                 | 0.84         | 0.62, 1.19 | 19                                                | 0.15                               | 0.03, 0.45 | 0.15                                | 0.03, 0.51 |
| Other objective/semi-objective                                            | 0.92         | 0.71, 1.19 | 19                                                | 0.12                               | 0.03, 0.33 | 0.11                                | 0.02, 0.34 |
| Subjective/Mixed                                                          | 0.82         | 0.69, 1.01 | 42                                                | 0.14                               | 0.03, 0.34 | 0.09                                | 0.02, 0.23 |
| <i>Interaction Between Blinding and Sequence Generation</i>               |              |            |                                                   |                                    |            |                                     |            |
| All                                                                       | 0.77         | 0.66, 0.91 | 81                                                | 0.10                               | 0.02, 0.25 | 0.11                                | 0.03, 0.23 |
| Mortality                                                                 | 0.76         | 0.48, 1.20 | 19                                                | 0.15                               | 0.02, 0.49 | 0.12                                | 0.02, 0.36 |
| Other objective/semi-objective                                            | 0.93         | 0.68, 1.31 | 20                                                | 0.13                               | 0.03, 0.41 | 0.14                                | 0.03, 0.37 |
| Subjective/Mixed                                                          | 0.72         | 0.58, 0.93 | 42                                                | 0.10                               | 0.02, 0.27 | 0.12                                | 0.02, 0.30 |
| <i>Incomplete Outcome Data</i>                                            |              |            |                                                   |                                    |            |                                     |            |
| All                                                                       | 1.00         | 0.94, 1.08 | 112                                               | 0.07                               | 0.01, 0.15 | 0.07                                | 0.01, 0.17 |
| Mortality                                                                 | 1.00         | 0.81, 1.20 | 19                                                | 0.11                               | 0.03, 0.30 | 0.11                                | 0.02, 0.30 |
| Other objective/semi-objective                                            | 1.03         | 0.88, 1.20 | 28                                                | 0.12                               | 0.03, 0.29 | 0.10                                | 0.02, 0.30 |
| Subjective/Mixed                                                          | 1.01         | 0.90, 1.12 | 65                                                | 0.07                               | 0.02, 0.16 | 0.10                                | 0.03, 0.22 |

Number of contributing meta-analyses (trials): all outcomes 222 (2403); mortality 42 (429); Other objective/semi-objective 54 (568); Subjective/mixed 126 (1406). ROR = ratio of odds ratios; CrI = credible interval.
